# Supplementary material for: Flutamide degradation driven by sulfonic acids: unforeseen salts and salt polymorphs of a degraded flutamide impurity
Source: Royal Society of Chemistry journal article supplement (doi:10.1039/d4ce00979g), 2025-01-01
Supplement: d4ce00979g1.pdf [file d4ce00979g1.pdf]

**Flutamide degradation driven by sulfonic acids: An unforeseen salts and salt polymorphs  
of degraded flutamide impurity**

Jupally Prashanth <sup>ac</sup>, Krishna Prasad Pisini <sup>bc</sup>, Anuja Venkata Sai Durga Surampudi <sup>a,c</sup>, Sunil  
Kumar Nechipadappu <sup>ac</sup>, Debasish Swain <sup>bc\*</sup>, Sridhar Balasubramanian <sup>ac\*</sup>

<sup>a</sup>Centre for X-ray Crystallography, Department of Analytical & Structural Chemistry, CSIR-  
Indian Institute of Chemical Technology, Tarnaka, Uppal Road, Hyderabad-500007, Telangana,  
India.

<sup>b</sup>Department of Analytical & Structural Chemistry, CSIR-Indian Institute of Chemical  
Technology, Tarnaka, Uppal Road, Hyderabad-500007, Telangana, India.

<sup>c</sup>Academy of Scientific and Innovative Research (AcSIR), Ghaziabad - 201002, India.

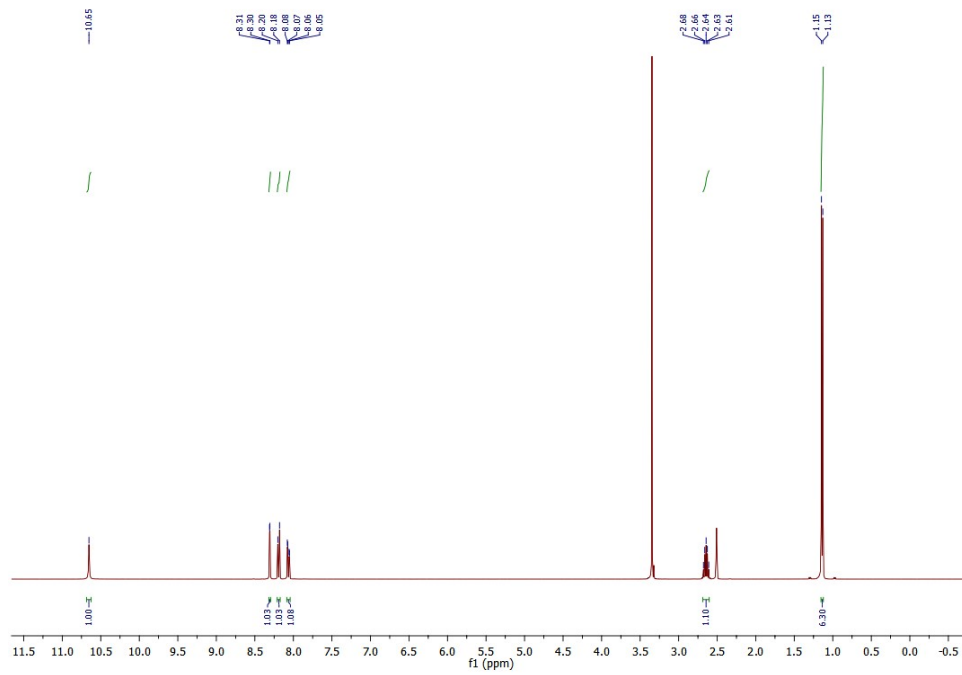

Figure S1. <sup>1</sup>H NMR spectra of Flutamide.

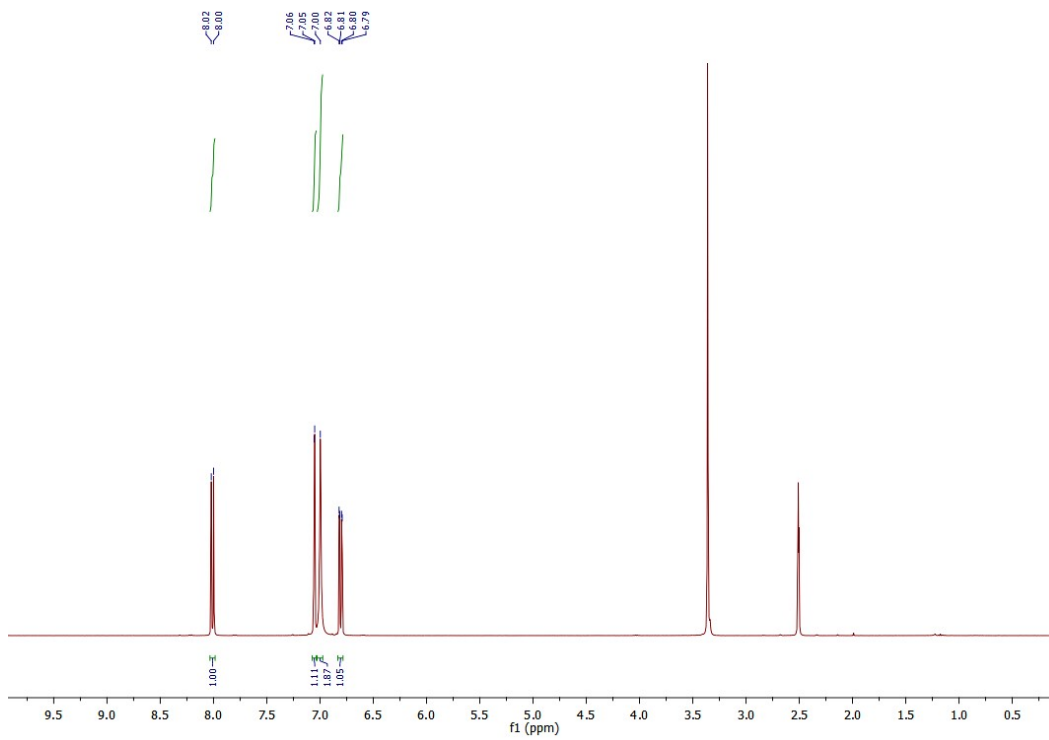

Figure S2. <sup>1</sup>H NMR spectra of Flu.D.

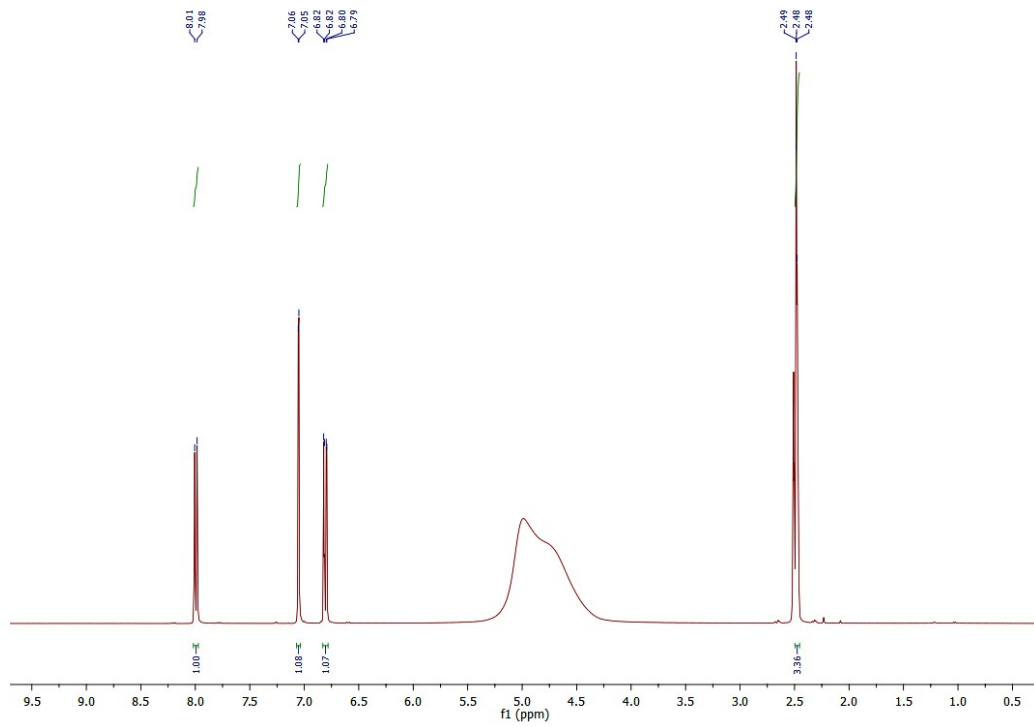

Figure S3.  $^1\text{H}$  NMR spectra of Flu.D-MSA (1:1).

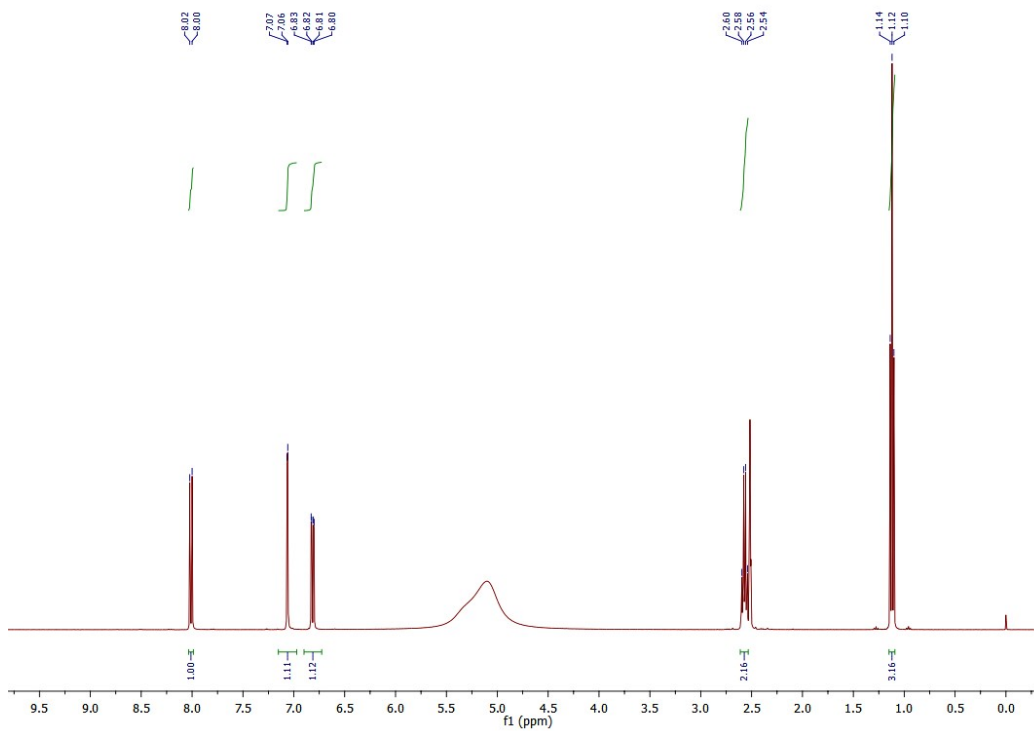

Figure S4.  $^1\text{H}$  NMR spectra of Flu.D-ESA (2:2).

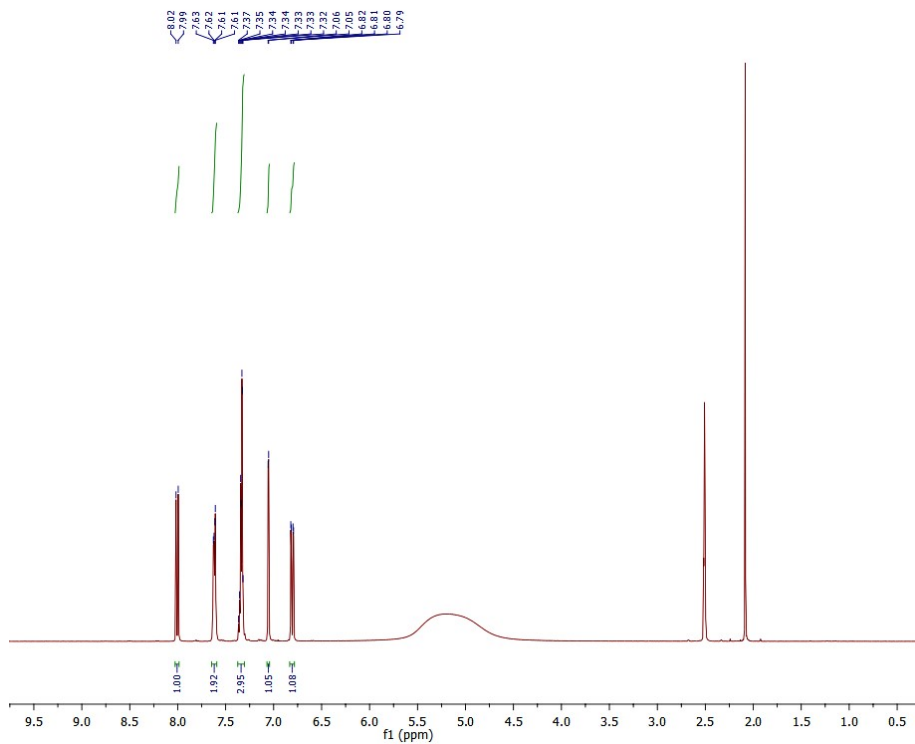

Figure S5.  $^1\text{H}$  NMR spectra of Flu.D-BSA (2:2).

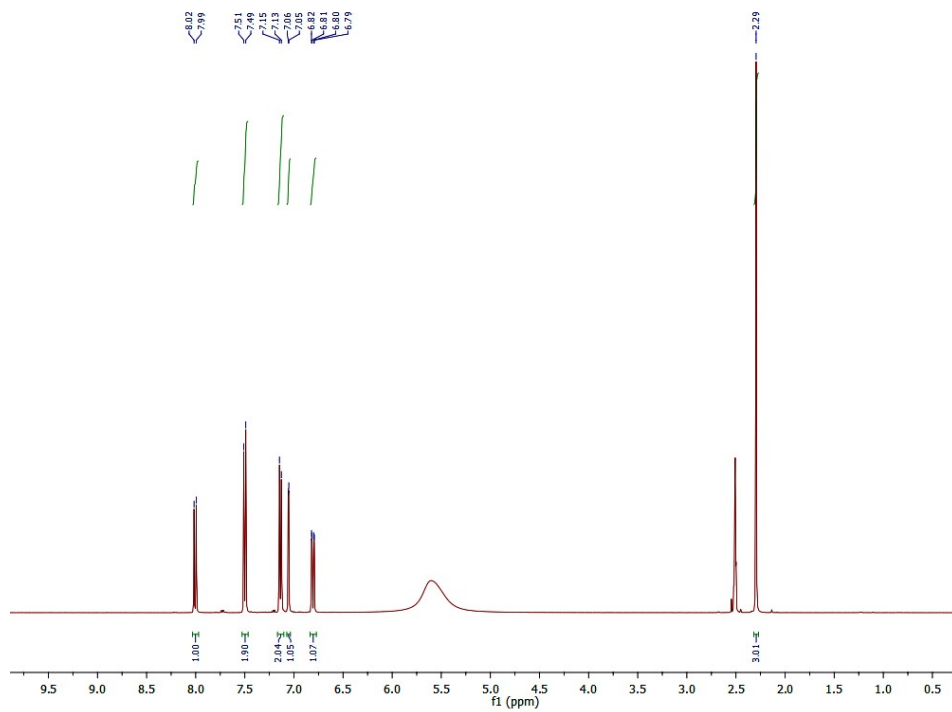

Figure S6.  $^1\text{H}$  NMR spectra of Flu.D-PTSA (2:2).

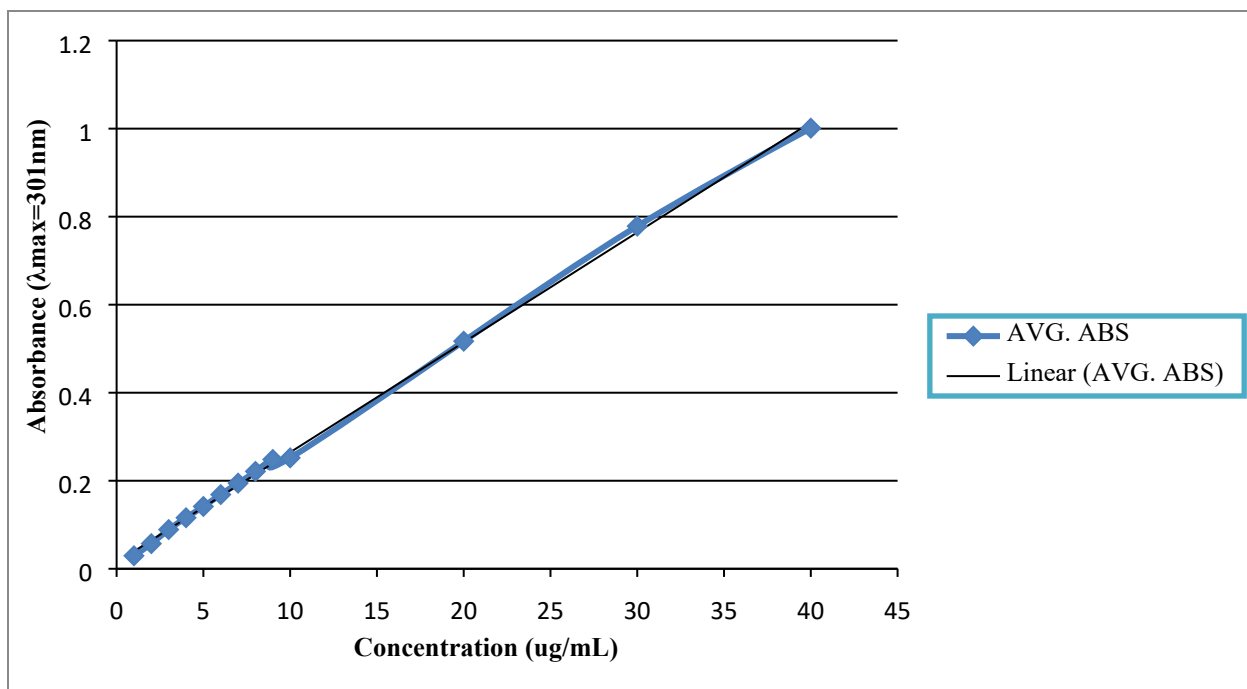

Figure S7. Linearity curve of flutamide (in water) using UV-Visible spectroscopy for dissolution studies.

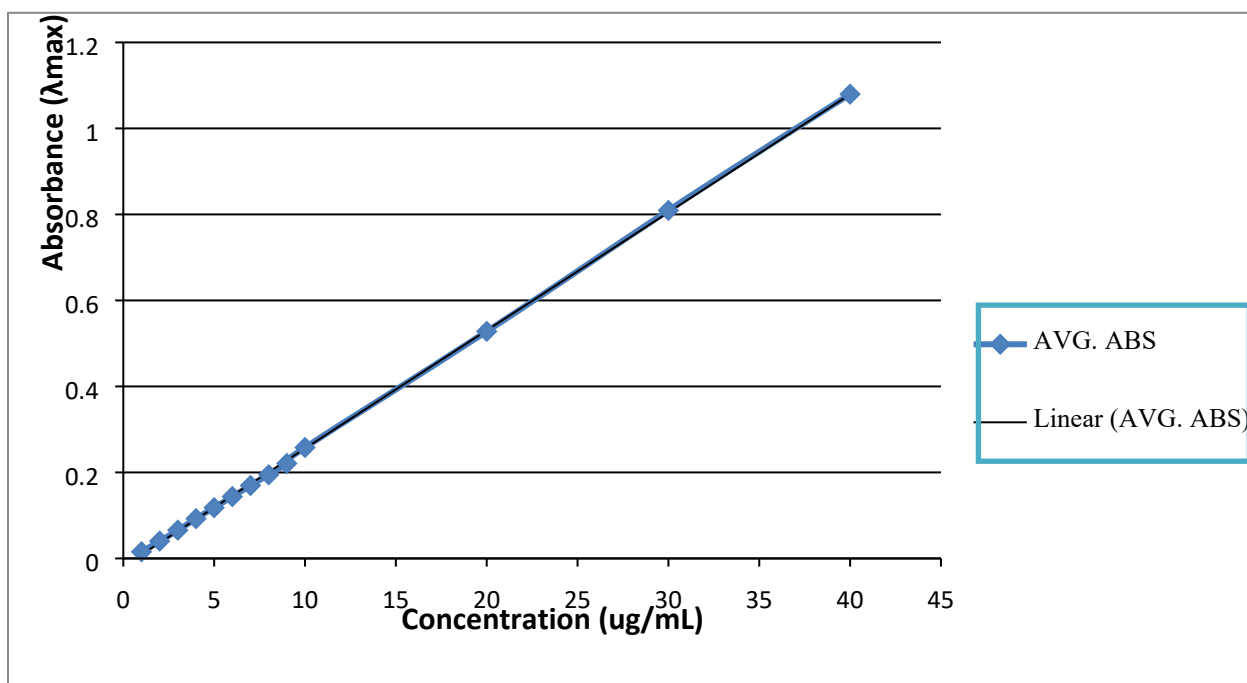

Figure S8. Linearity curve of flutamide (in pH 1.2) using UV-Visible spectroscopy for dissolution studies.

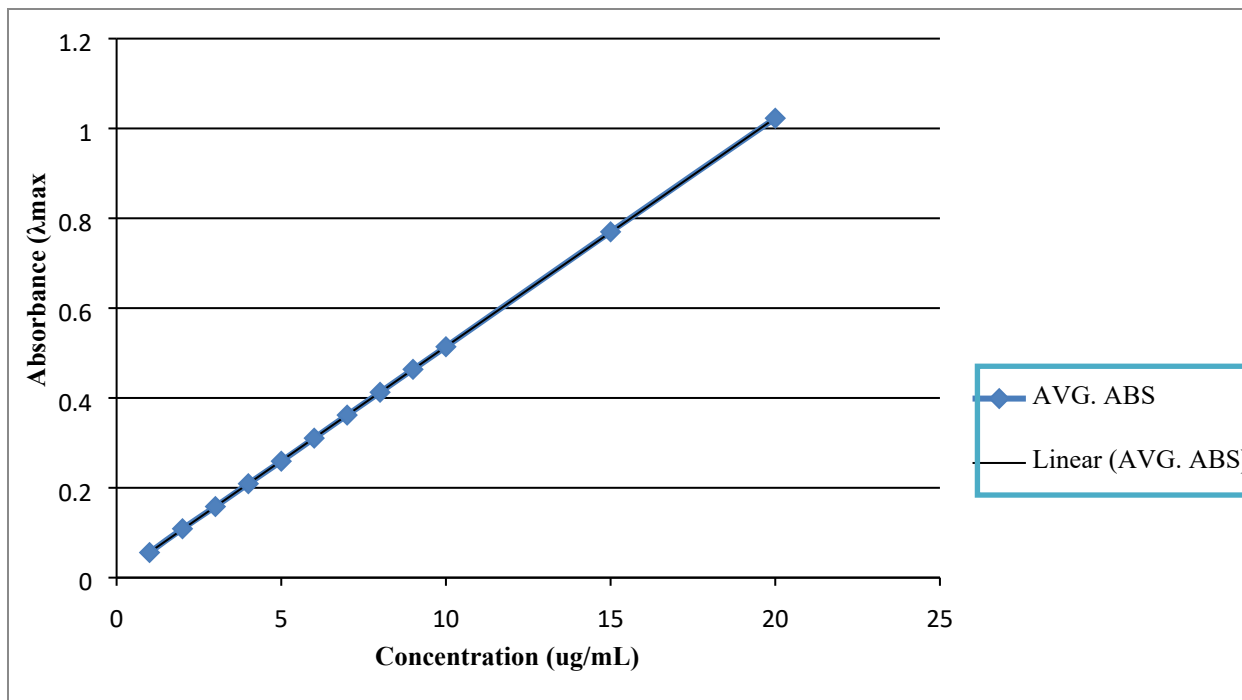

Figure S9. Linearity curve of Flu.D (in water) using UV-Visible spectroscopy for dissolution studies.

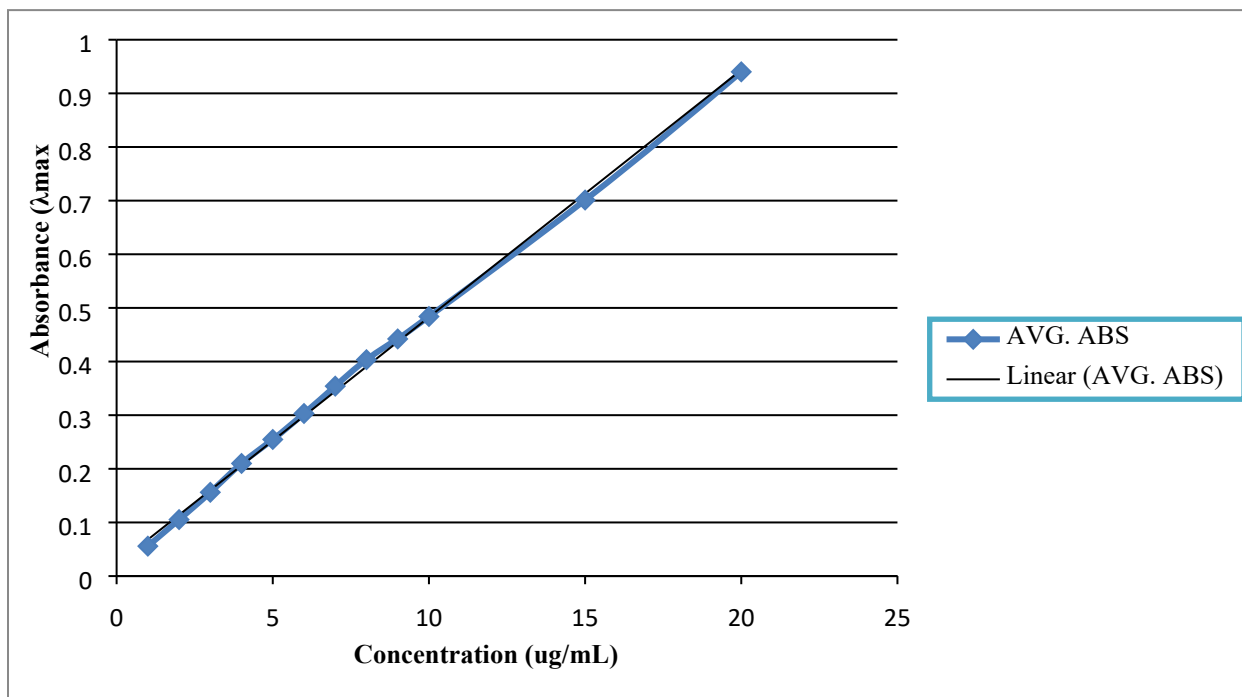

Figure S10. Linearity curve of Flu.D (in pH 1.2) using UV-Visible spectroscopy for dissolution studies.

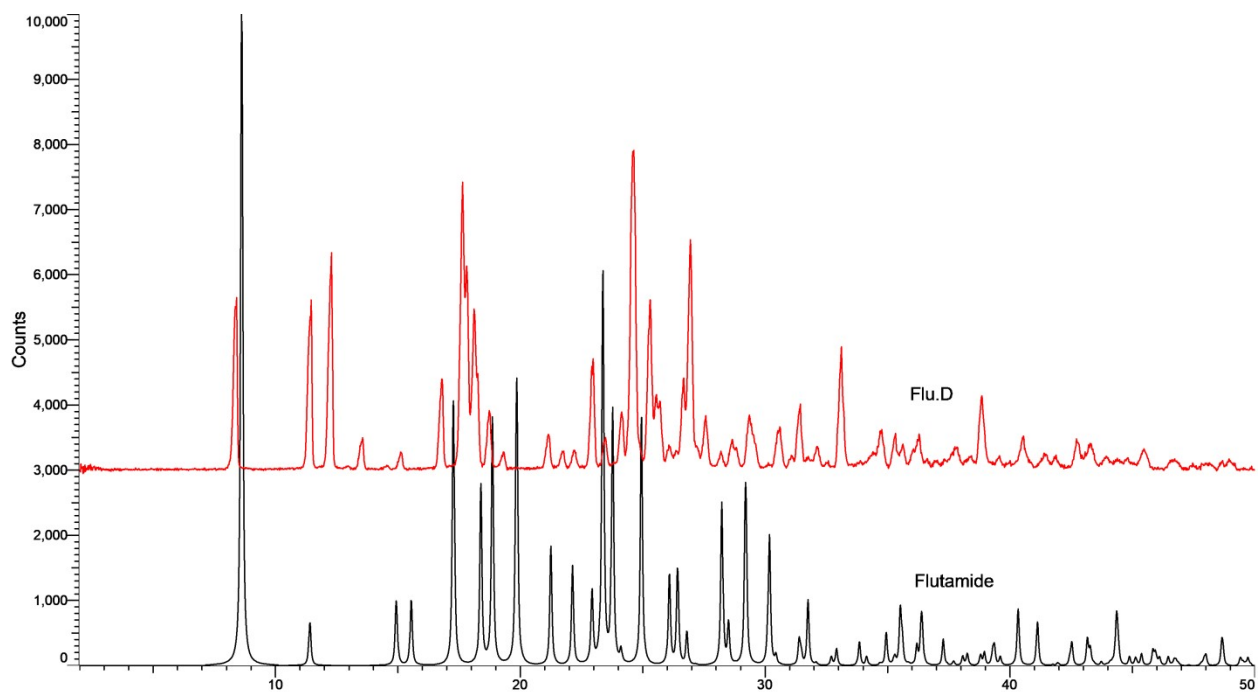

Figure S11. PXRD overlay of flutamide with the impurity (Flu.D) showing distinct peaks.

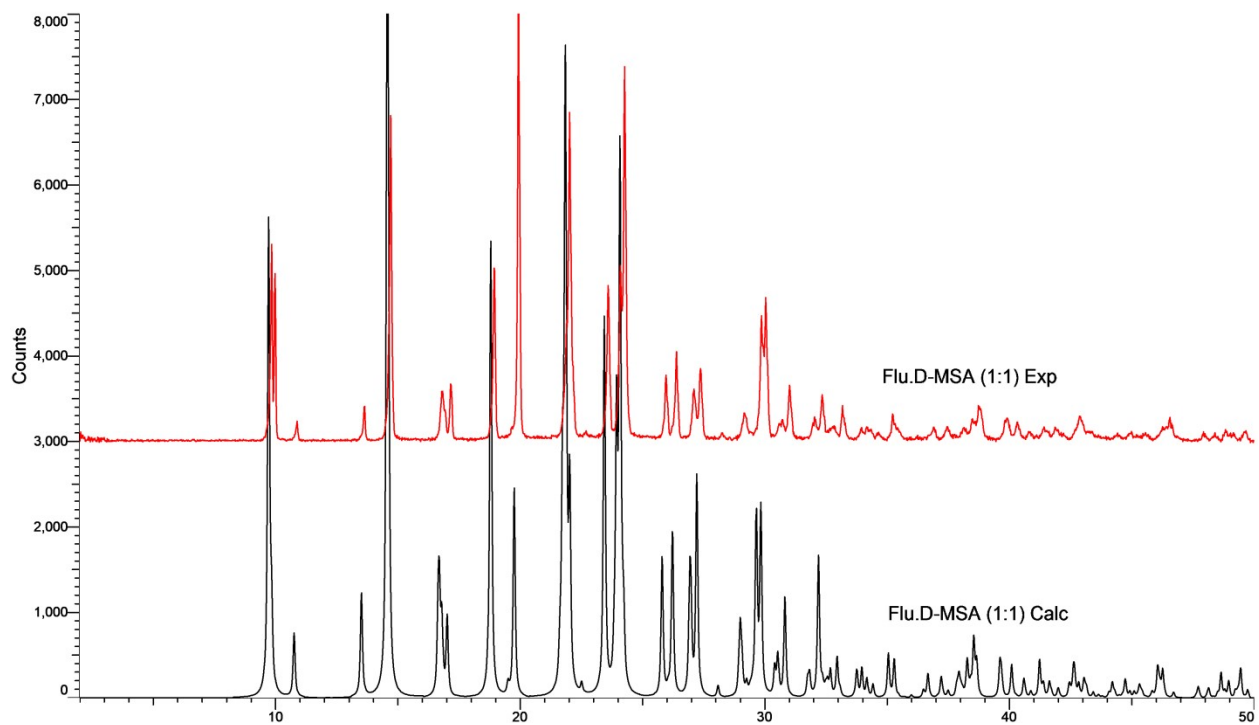

Figure S12. Comparison of simulated (Flu.D-MSA (1:1) Calc) and experimental (Flu.D-MSA (1:1)Exp) PXRD patterns, demonstrating phase purity of the salts.

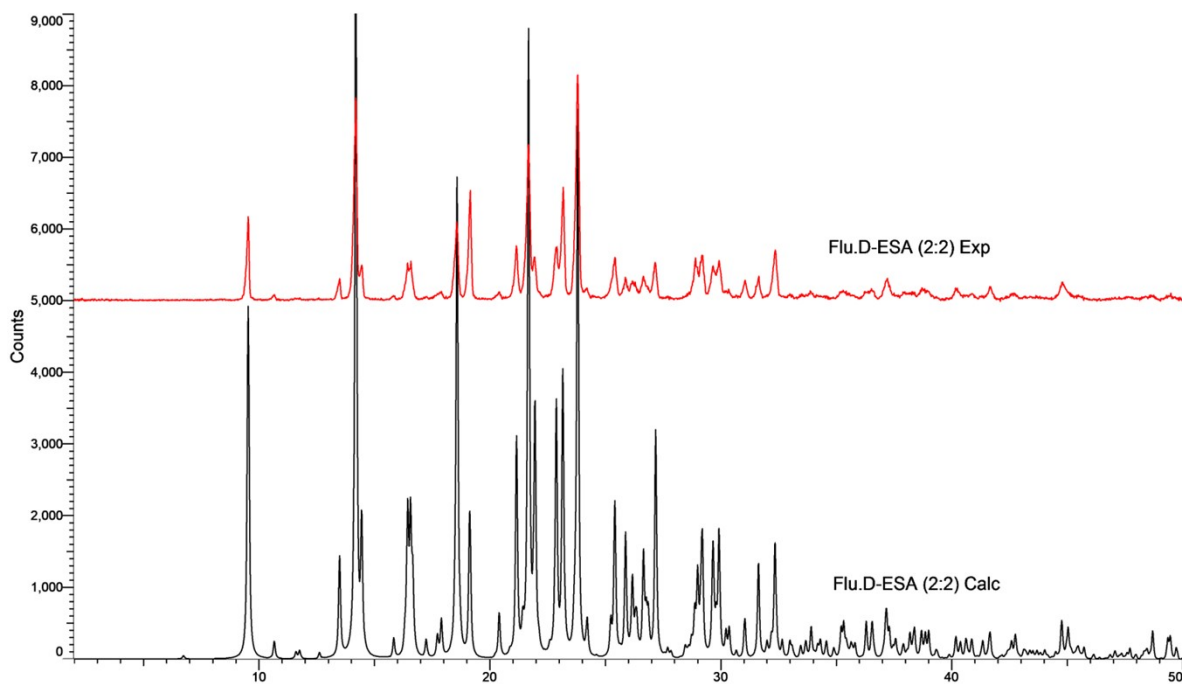

Figure S13. PXRD overlay of Flu.D-ESA (2:2) simulated pattern (Flu.D-ESA (2:2) Calc) with phase pure experimental pattern (Flu.D-ESA (2:2) Exp).

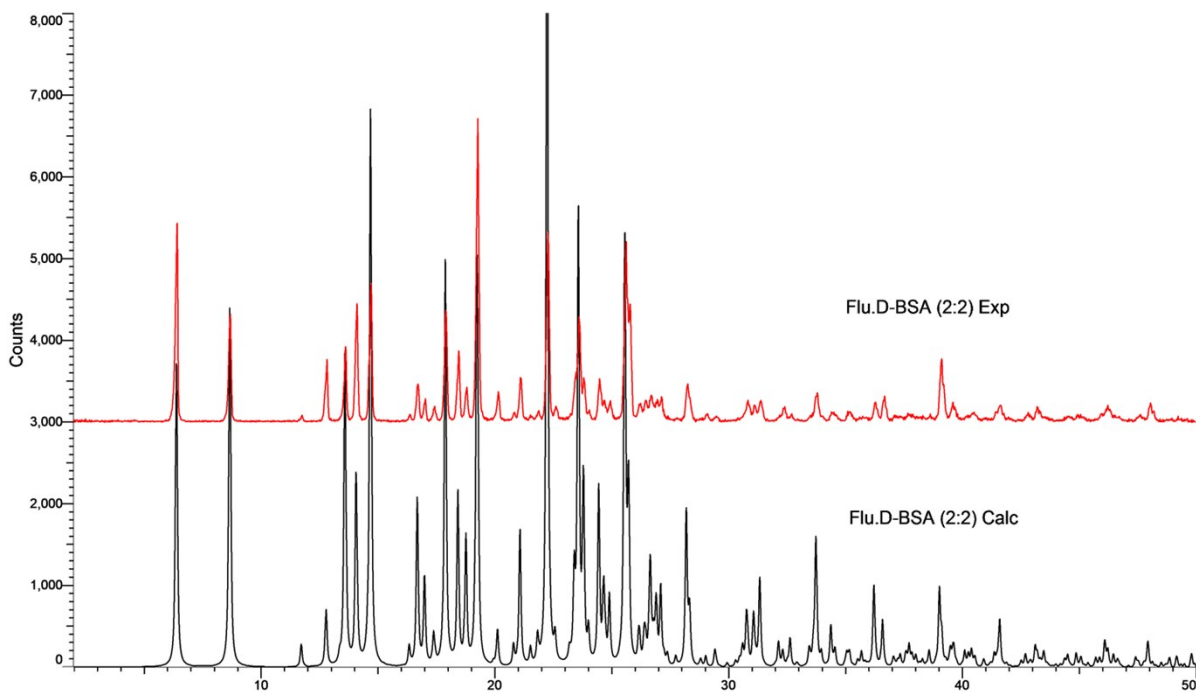



Figure S14. PXRD overlay of Flu.D-BSA (2:2) simulated pattern (Flu.D-BSA (2:2) Calc) with phase pure experimental pattern (Flu.D-BSA (2:2) Exp).

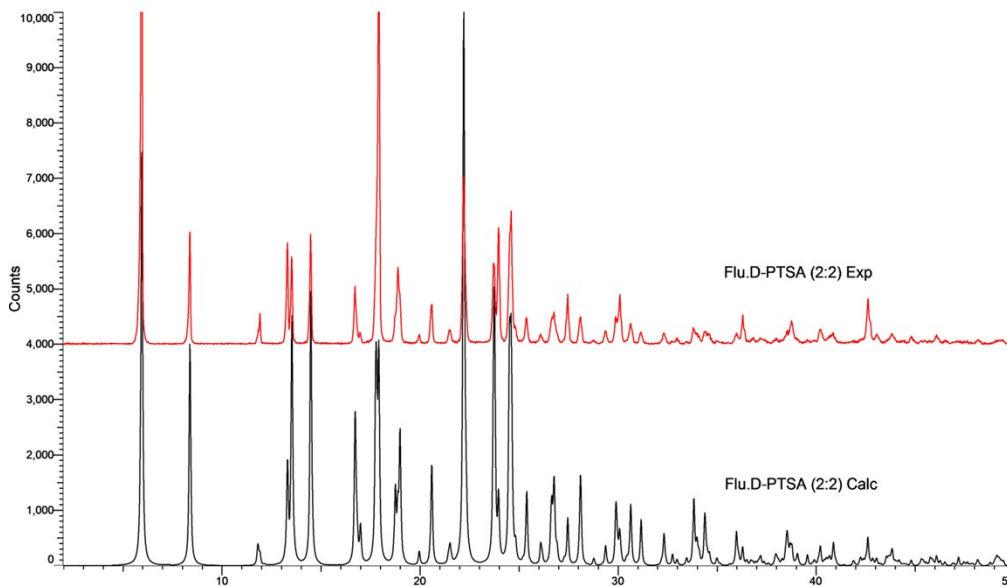

Figure S15. Overlay of calculated and experimental PXRD patterns of Flu.D-PTSA (2:2) composition, indicating the phase purity.

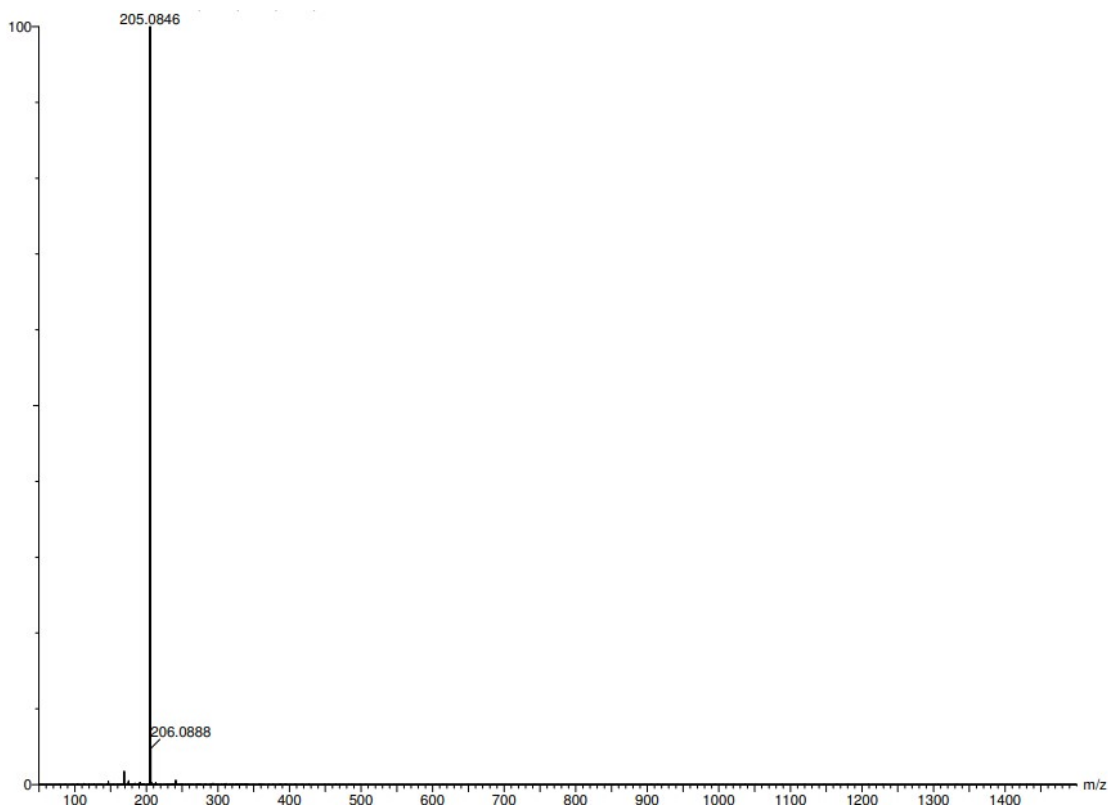

Figure S16. ESI-QTOF MS spectra of Flu.D.

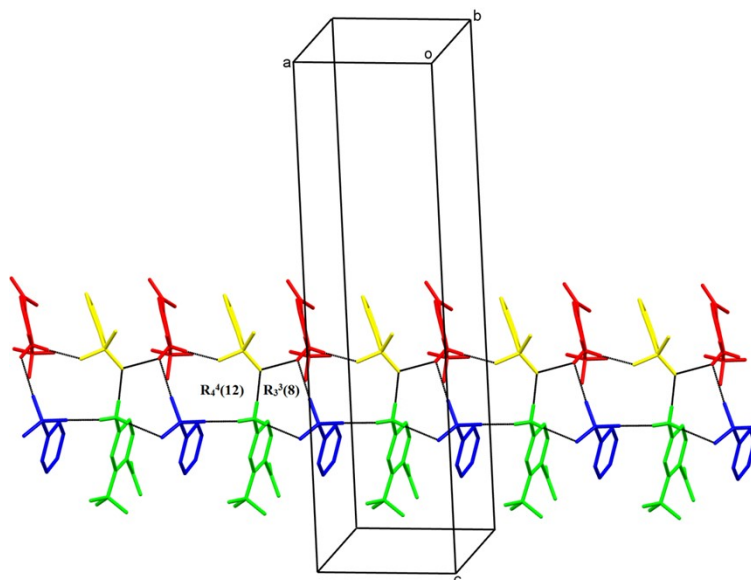

Figure S17. Part of crystal packing of Flu-BSA 6:6 showing one dimensional chain sets and tetramer motifs formed between A and B molecules which aggregate into 2D sheets. H atoms that are not involved in hydrogen bonding have been omitted for clarity. Hydrogen bonds are shown as dashed lines. The green color represents Flu.D A molecule, BSA A (blue), Flu.D B (red), BSA B(yellow).

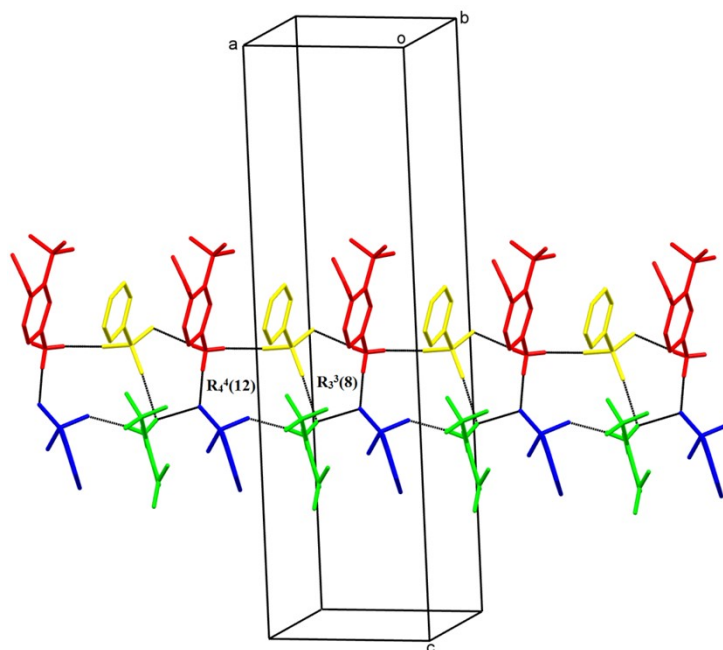

Figure S18. Part of crystal packing of Flu.D-BSA 6:6 showing infinite 1D chain and tetrameric sets between C and D molecules which in turn aids to form 2D sheets. H atoms that are not

involved in hydrogen bonding have been omitted for clarity. Hydrogen bonds are shown as dashed lines. The green color indicates Flu.D molecule C, BSA C (blue), Flu.D D (yellow), BSA D molecule (red).

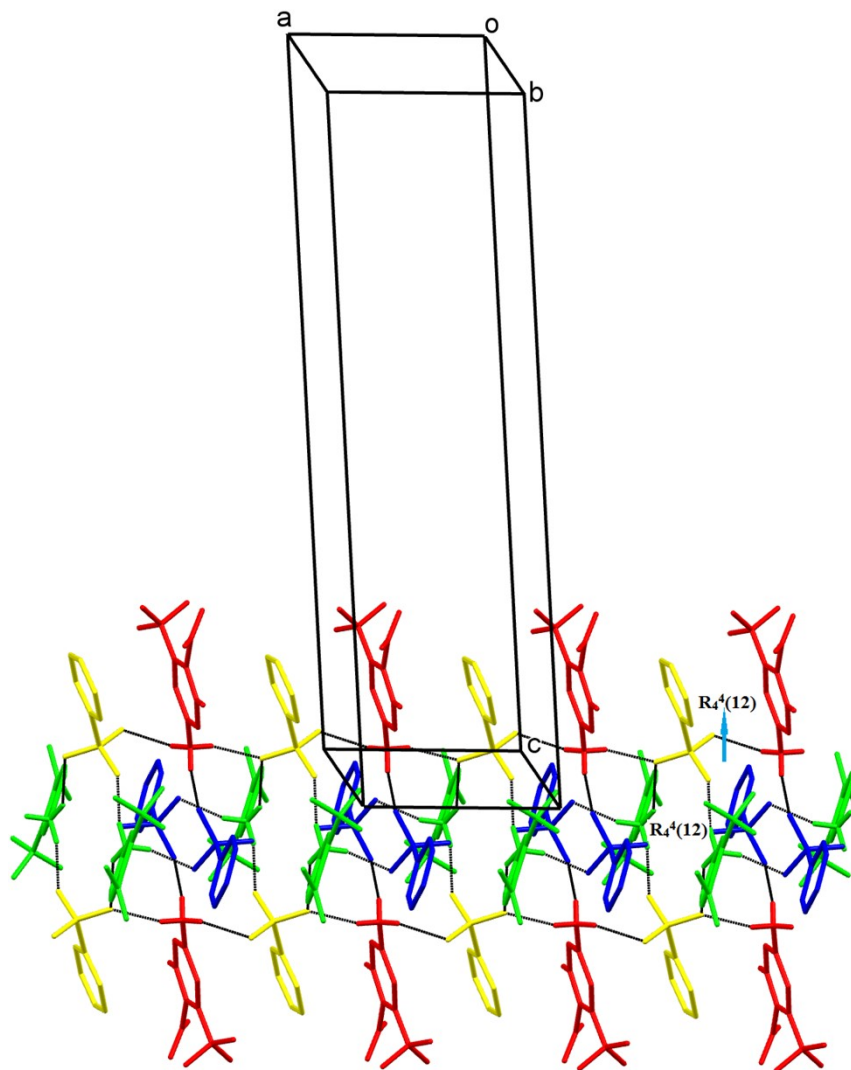

Figure S19. Part of crystal structure of Flu.D-BSA 6:6 which show 1D chain formed between F molecules of Flu.D and BSA along with tetrameric units generated between E and F molecules of Flu.D and BSA. H atoms that are not involved in hydrogen bonding have been omitted for clarity. Hydrogen bonds are shown as dashed lines. The green color represents Flu.D E molecule, BSA E (blue), Flu.D F (yellow), and BSA F (red).

### Flu.D-MSA (1:1)

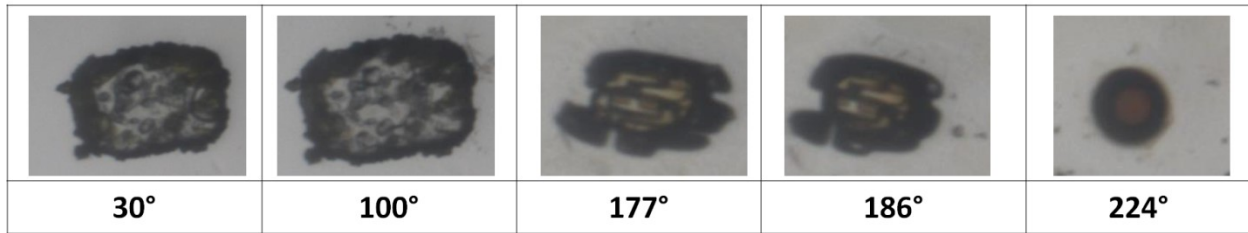

### Flu.D-BSA (2:2)

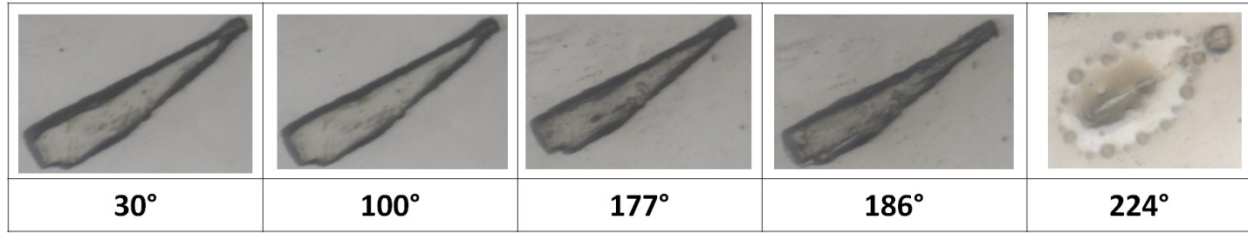

### Flu.D-PTSA (2:2)

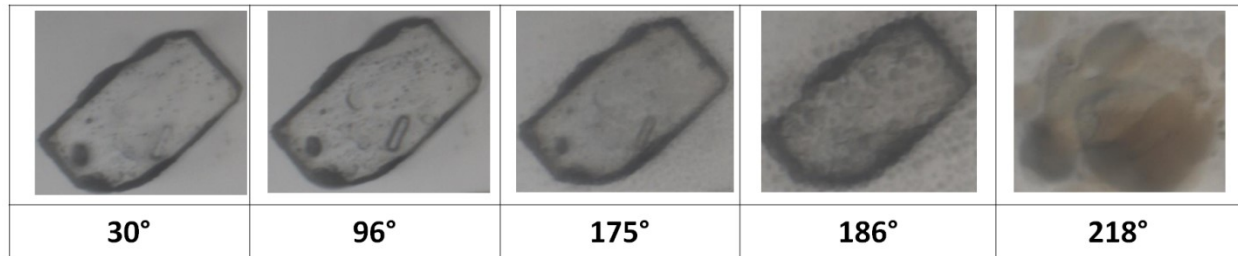

### Flu.D-ESA (2:2)

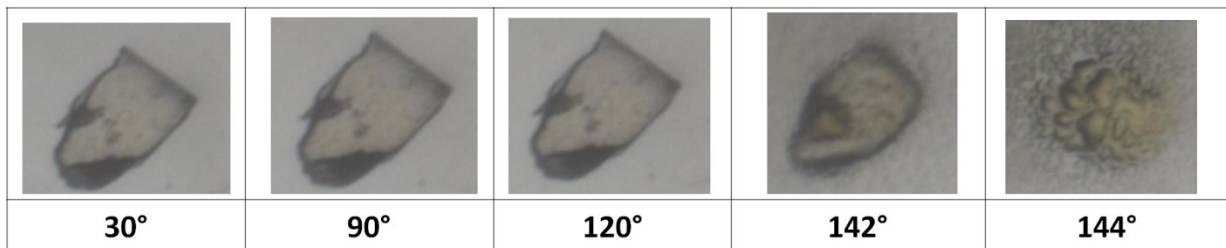

Figure S20. HSM studies demonstrate phase transformation in the salts, visually apparent as crystal darkening.

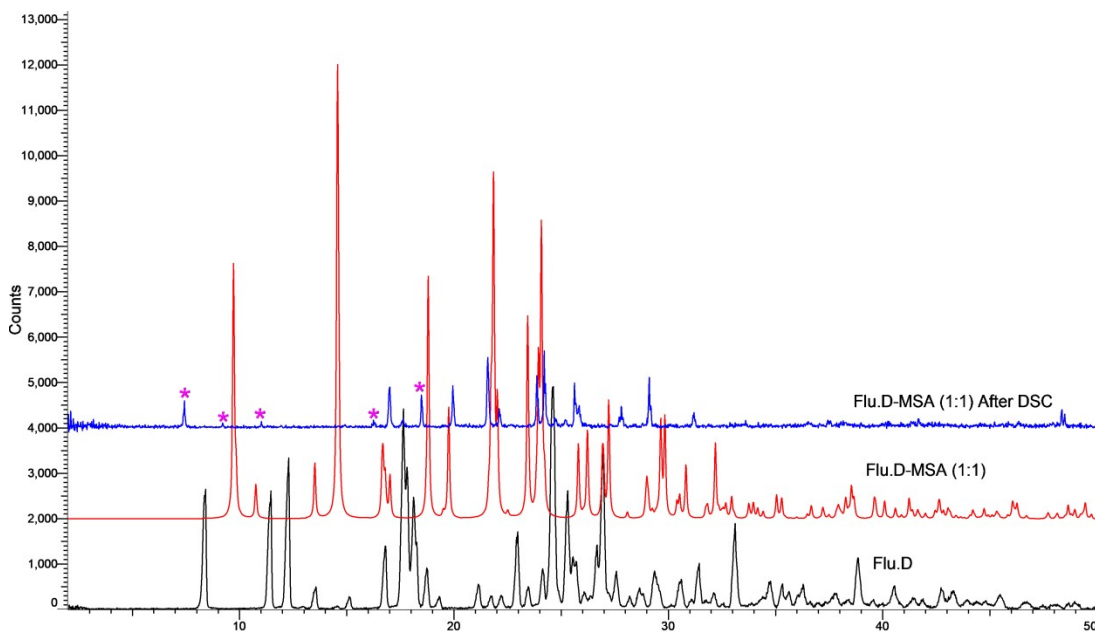

Figure S21. PXR overlay comparing Flu.D, Flu.D-MSA (1:1) before and after DSC (Flu.D-MSA (1:1) After DSC) which showcases the phase transformation. \* indicates the unknown phase.

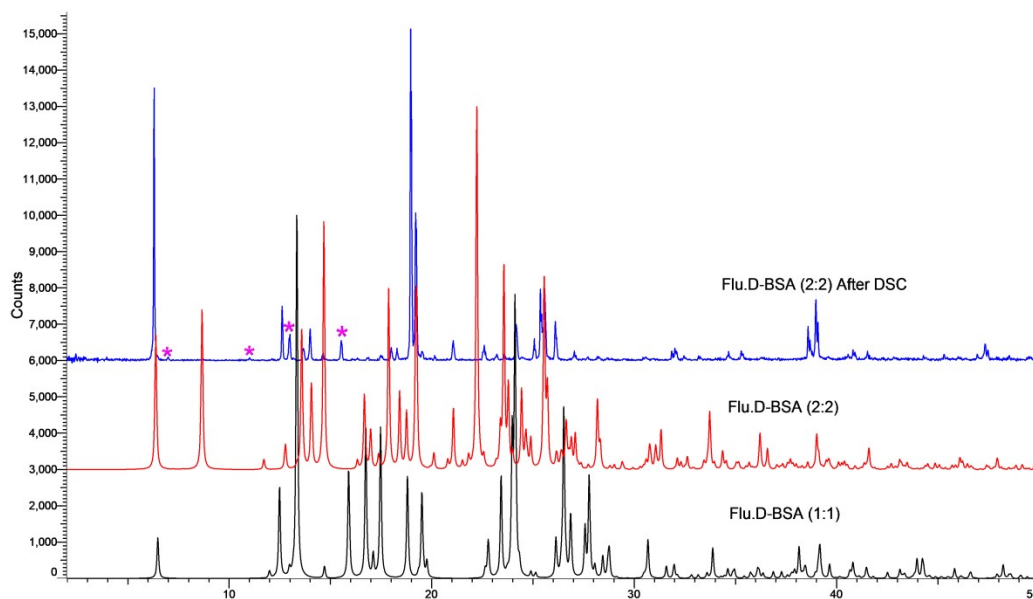

Figure S22. PXR overlay of Flu.D-BSA (1:1) and Flu.D-BSA (2:2) which was used for DSC analysis with the obtained form after phase transformation (Flu.D-BSA (2:2) After DSC) experiment. \* indicates the unknown phase.

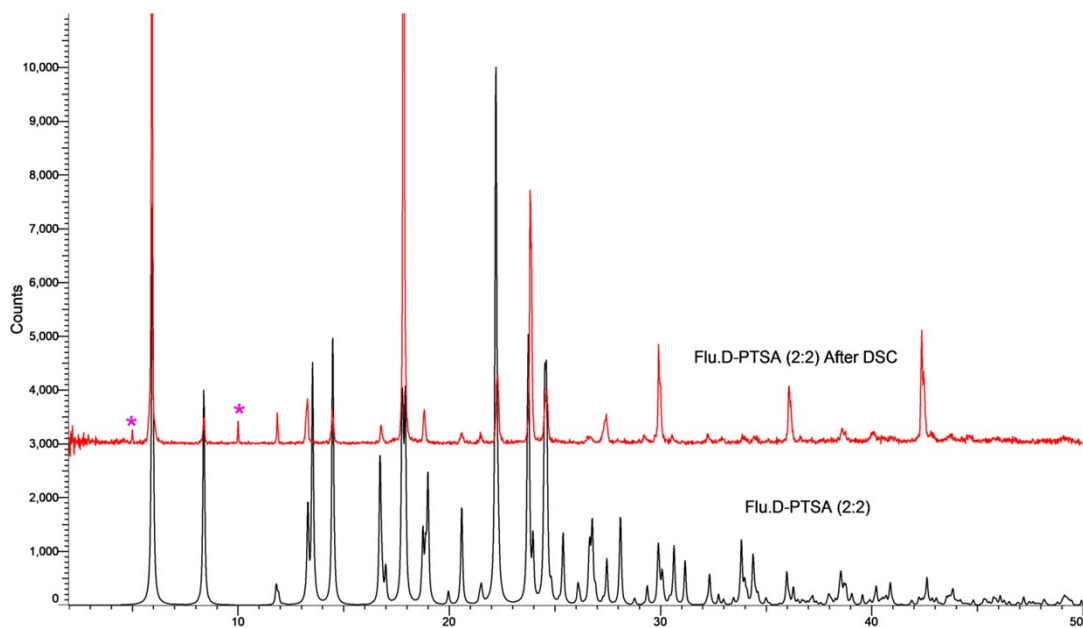

Figure S23. PXRD overlay of Flu.D-PTSA (2:2) which was used for DSC analysis with the obtained form after phase transformation (Flu.D-PTSA (2:2) After DSC) experiment. \* indicates the unknown phase.

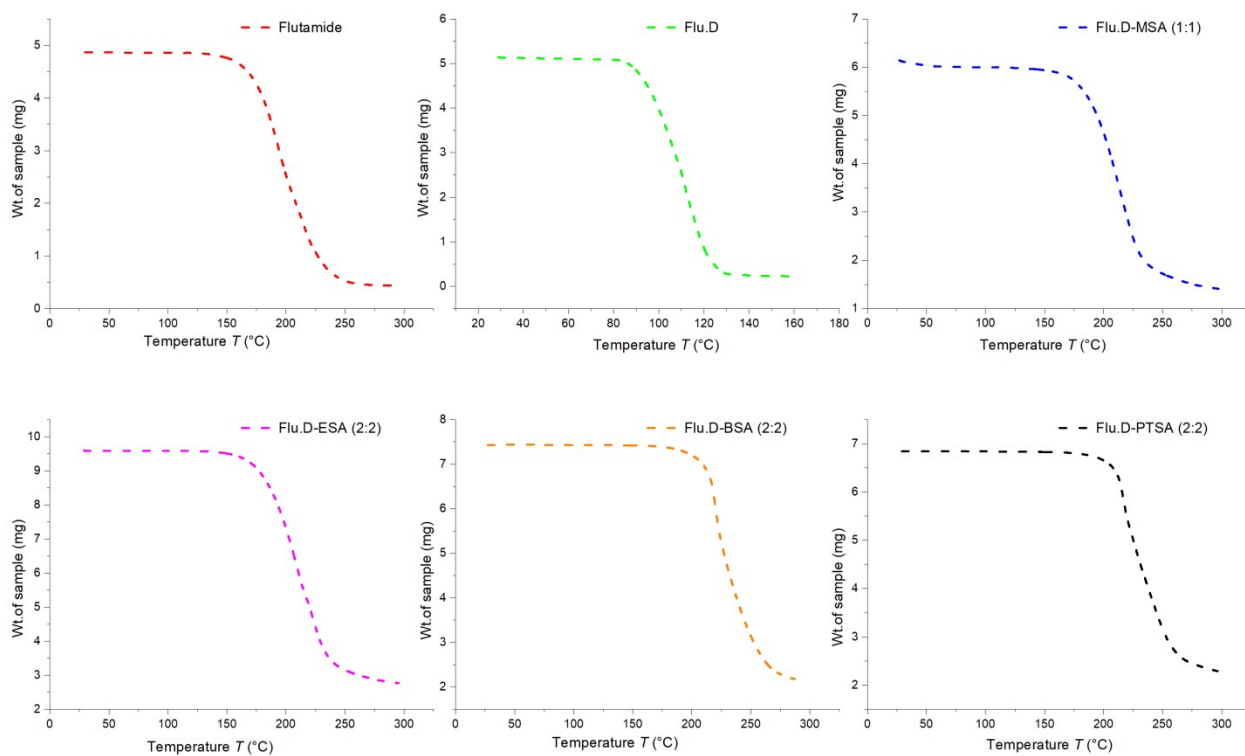

Figure S24. TGA data of newly obtained salts.

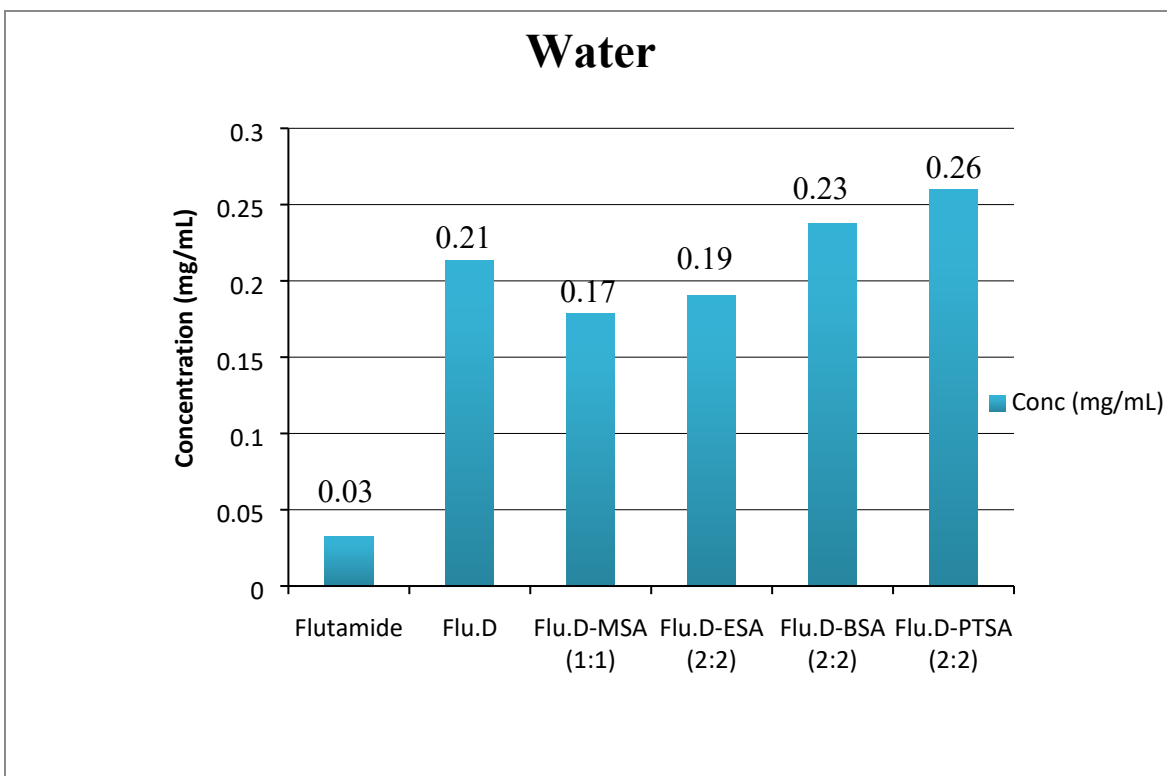

Figure S25. Solubility data of flutamide, Flu.D and its salts performed in water media.

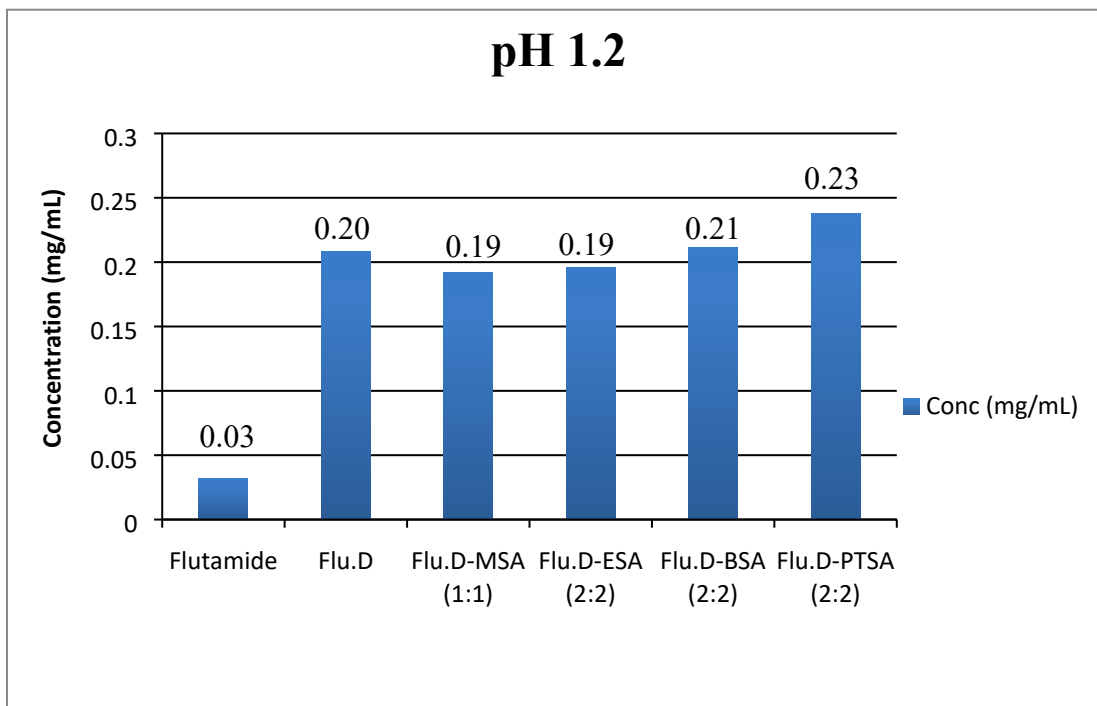

Figure S26. Solubility data of flutamide, Flu.D and its salts performed in pH 1.2 buffer media.

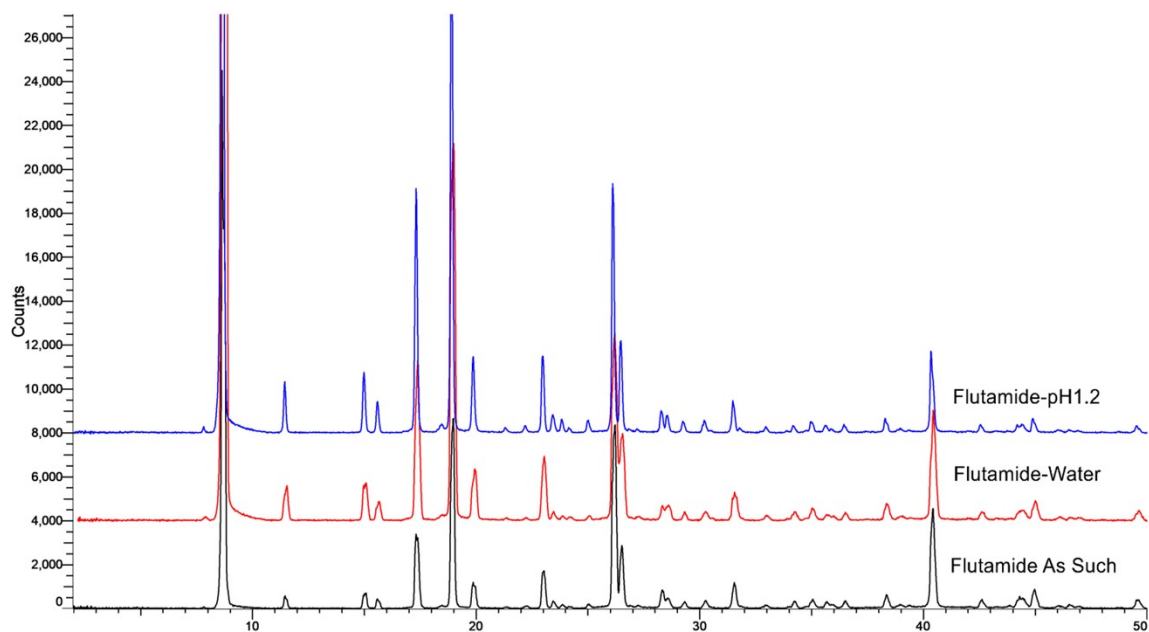

Figure S27. PXR overlay of flutamide as such with residues recovered after solubility study (24hr) in water (Flutamide-Water) and pH 1.2 (Flutamide-pH 1.2) media.

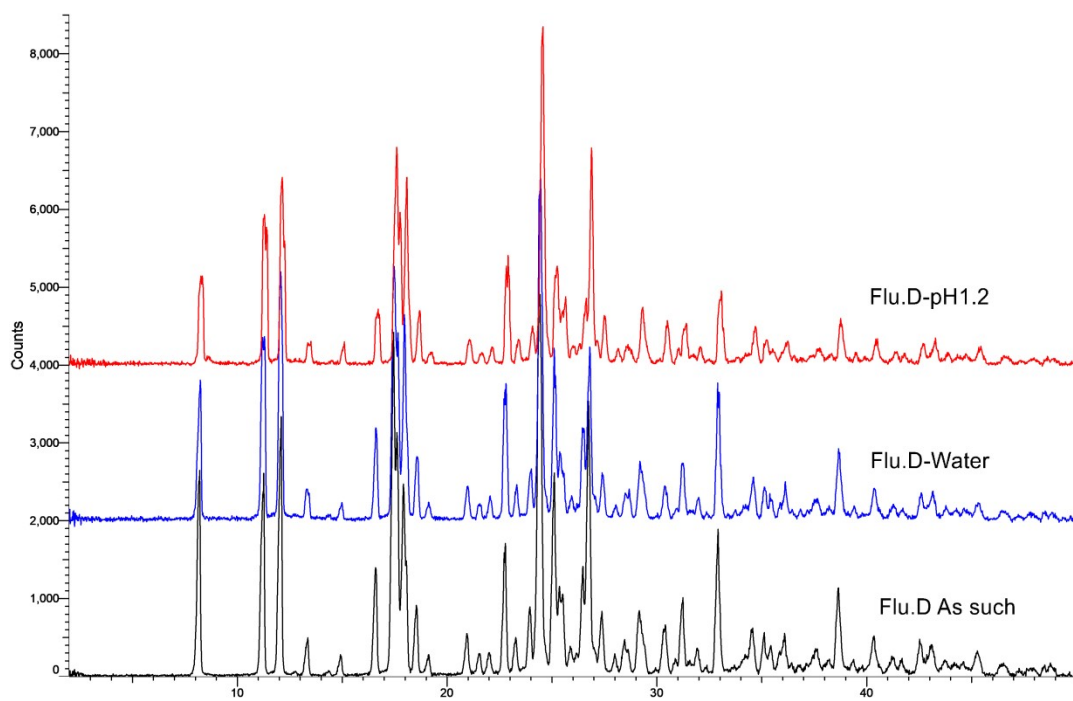

Figure S28. PXR overlay of Flu.D parent (Flu.D as such) with residues recovered from water (Flu.D-Water) and pH 1.2 (Flu.D-pH 1.2) after 24hrs.



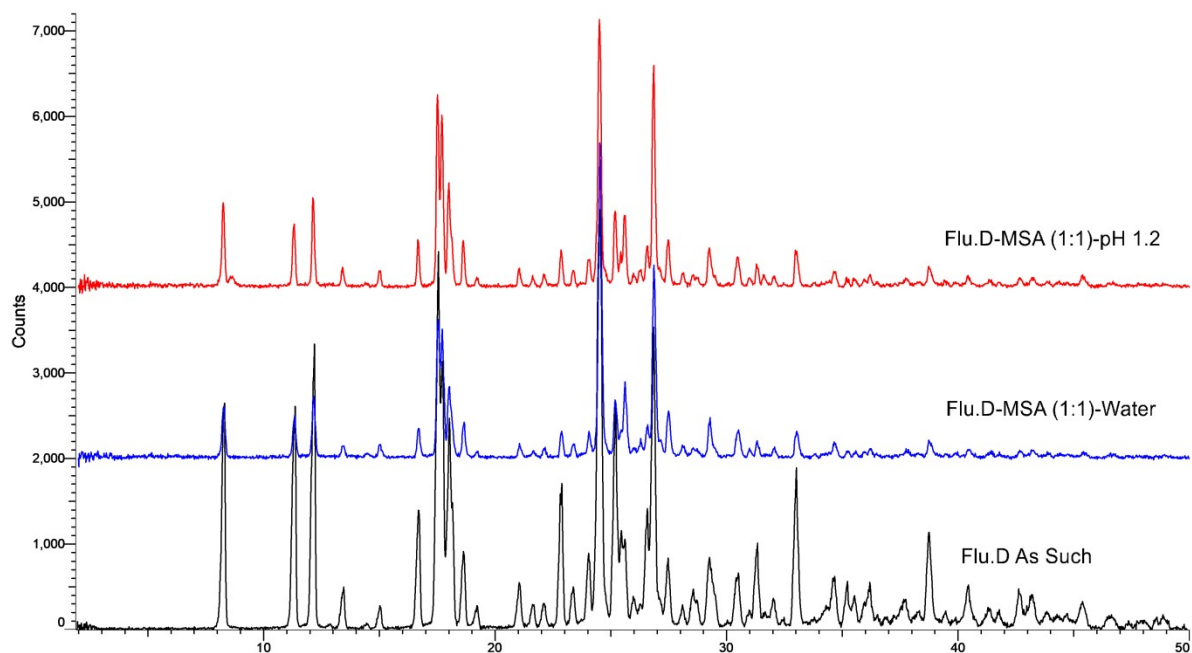

Figure S29. PXR overlay of Flu.D parent (Flu.D as such) with residues recovered after equilibrium solubility study (24hr) in water (Flu.D-MSA (1:1)-Water) and pH 1.2 (Flu.D-MSA (1:1)-pH 1.2).

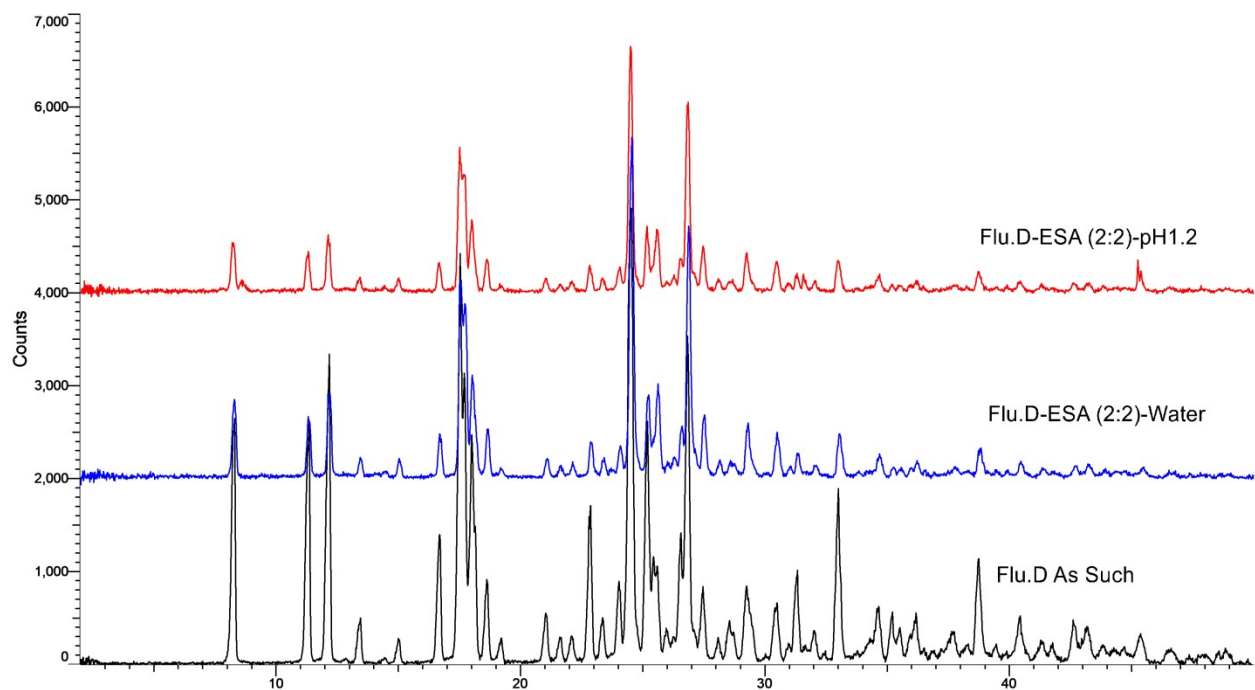

Figure S30. PXR overlay of Flu.D with samples recovered after 24hrs solubility study in water (Flu.D-ESA (2:2)-Water) and pH 1.2 (Flu.D-ESA (2:2)-pH 1.2).

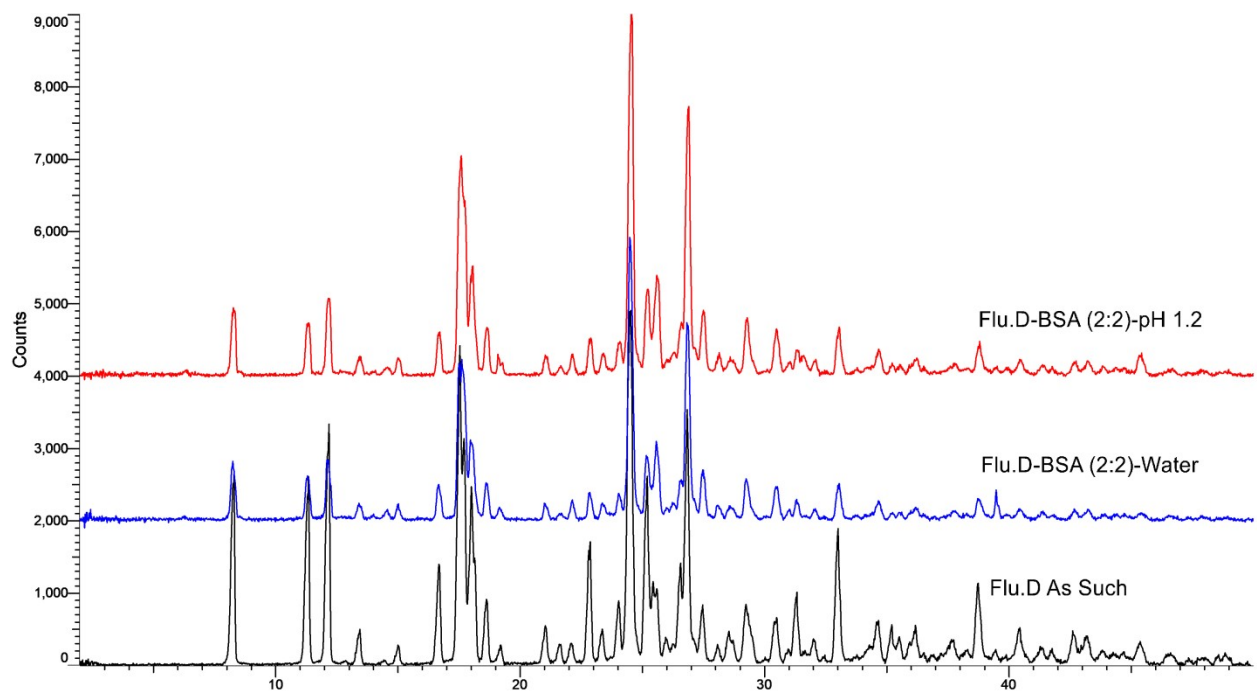

Figure S31. PXR overlay of Flu.D with residues recovered after solubility study (24hr) in water (Flu.D-BSA (2:2)-Water) and pH 1.2 (Flu.D-BSA (2:2)-pH1.2).

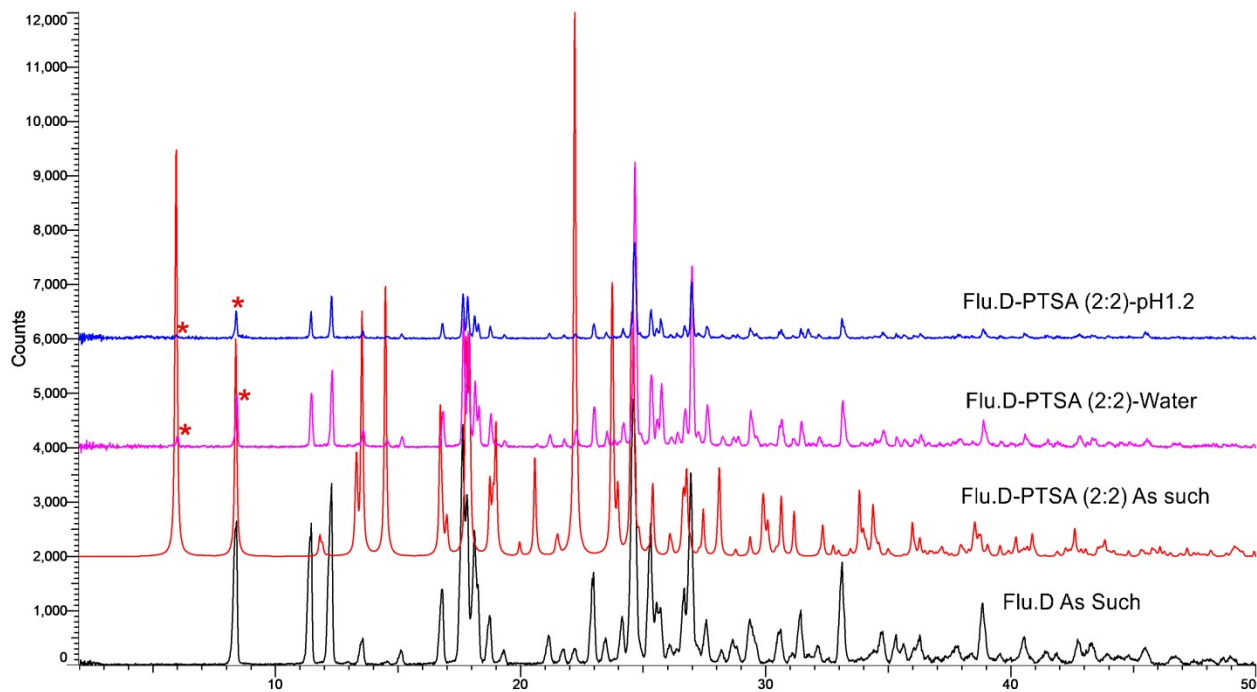

Figure S32. PXR overlay of Flu.D, Flu.D-PTSA (2:2) with residues recovered after 24hr solubility study in water (Flu.D-PTSA (2:2)-Water) and pH 1.2 (Flu.D-PTSA (2:2)-pH1.2)).

| Table S1. Crystallographic data and structure refinement parameters of the Flu.D salts. |                                                                                                                                               |                                                                                                                                              |                                                                                                                                                                |                                                                                                                                                                |                                                                                                                                                                |                                                                                                                                                                |                                                                                                                                                                |                                                                                                                                                                                                                  |
|-----------------------------------------------------------------------------------------|-----------------------------------------------------------------------------------------------------------------------------------------------|----------------------------------------------------------------------------------------------------------------------------------------------|----------------------------------------------------------------------------------------------------------------------------------------------------------------|----------------------------------------------------------------------------------------------------------------------------------------------------------------|----------------------------------------------------------------------------------------------------------------------------------------------------------------|----------------------------------------------------------------------------------------------------------------------------------------------------------------|----------------------------------------------------------------------------------------------------------------------------------------------------------------|------------------------------------------------------------------------------------------------------------------------------------------------------------------------------------------------------------------|
| Compound                                                                                | Flu.D-MSA (1:1)                                                                                                                               | Flu.D-MSA (2:2)                                                                                                                              | Flu.D-ESA (2:2)                                                                                                                                                | Flu.D-BSA (1:1)                                                                                                                                                | Flu.D-BSA(2:2)                                                                                                                                                 | Flu.D-BSA(6:6)                                                                                                                                                 | Flu.D-PTSA (2:2)                                                                                                                                               | Flu.D-PTSA-H <sub>2</sub> O (1:2:3)                                                                                                                                                                              |
| Chemical formula                                                                        | C <sub>7</sub> H <sub>6</sub> F <sub>3</sub><br>N <sub>2</sub> O <sub>2</sub> <sup>+</sup> ·C<br>H <sub>3</sub> O <sub>3</sub> S <sup>-</sup> | C <sub>7</sub> H <sub>6</sub> F <sub>3</sub> N <sub>2</sub><br>O <sub>2</sub> <sup>+</sup> ·CH <sub>3</sub><br>O <sub>3</sub> S <sup>-</sup> | C <sub>7</sub> H <sub>6</sub> F <sub>3</sub><br>N <sub>2</sub> O <sub>2</sub> <sup>+</sup> ·<br>C <sub>2</sub> H <sub>5</sub> O<br><sub>3</sub> S <sup>-</sup> | C <sub>7</sub> H <sub>6</sub> F <sub>3</sub><br>N <sub>2</sub> O <sub>2</sub> <sup>+</sup> ·<br>C <sub>6</sub> H <sub>5</sub> O <sub>3</sub><br>S <sup>-</sup> | C <sub>7</sub> H <sub>6</sub> F <sub>3</sub><br>N <sub>2</sub> O <sub>2</sub> <sup>+</sup> ·<br>C <sub>6</sub> H <sub>5</sub> O <sub>3</sub><br>S <sup>-</sup> | C <sub>7</sub> H <sub>6</sub> F <sub>3</sub><br>N <sub>2</sub> O <sub>2</sub> <sup>+</sup> ·<br>C <sub>6</sub> H <sub>5</sub> O <sub>3</sub><br>S <sup>-</sup> | C <sub>7</sub> H <sub>6</sub> F <sub>3</sub><br>N <sub>2</sub> O <sub>2</sub> <sup>+</sup> ·<br>C <sub>7</sub> H <sub>7</sub> O <sub>3</sub><br>S <sup>-</sup> | C <sub>7</sub> H <sub>6</sub> F <sub>3</sub> N <sub>2</sub> O <sub>2</sub> <sup>+</sup><br>·2(C <sub>7</sub> H <sub>7</sub> O <sub>3</sub> S <sup>-</sup> )·2(H <sub>2</sub> O)·H <sub>3</sub><br>O <sup>+</sup> |
| CCDC number                                                                             | 2386899                                                                                                                                       | 2386905                                                                                                                                      | 2386904                                                                                                                                                        | 2386900                                                                                                                                                        | 2386902                                                                                                                                                        | 2386906                                                                                                                                                        | 2386901                                                                                                                                                        | 2386903                                                                                                                                                                                                          |
| M <sub>r</sub>                                                                          | 302.23                                                                                                                                        | 302.23                                                                                                                                       | 316.26                                                                                                                                                         | 364.30                                                                                                                                                         | 364.30                                                                                                                                                         | 364.30                                                                                                                                                         | 378.32                                                                                                                                                         | 604.57                                                                                                                                                                                                           |
| Crystal system, space group                                                             | Monoclinic, C2/c                                                                                                                              | Monoclinic, Cc                                                                                                                               | Monoclinic, P2 <sub>1</sub> /c                                                                                                                                 | Monoclinic, P2 <sub>1</sub>                                                                                                                                    | Orthorhombic, Pca2 <sub>1</sub>                                                                                                                                | Triclinic, P1                                                                                                                                                  | Orthorhombic, Pca2 <sub>1</sub>                                                                                                                                | Monoclinic, P2 <sub>1</sub>                                                                                                                                                                                      |
| Temperature (K)                                                                         | 100 (2)                                                                                                                                       |                                                                                                                                              |                                                                                                                                                                |                                                                                                                                                                |                                                                                                                                                                |                                                                                                                                                                |                                                                                                                                                                |                                                                                                                                                                                                                  |
| a, b, c (Å)                                                                             | 21.4337 (18),<br>10.5337 (9),<br>12.9683 (12)                                                                                                 | 10.6002 (7),<br>10.6466 (7),<br>20.3303 (19)                                                                                                 | 12.9132 (14),<br>10.6737 (11),<br>18.342 (2)                                                                                                                   | 7.4154 (4),<br>7.5301 (4),<br>13.6961 (7)                                                                                                                      | 27.3846 (4),<br>7.4463 (8),<br>14.8172 (17)                                                                                                                    | 7.4616 (17),<br>21.345 (4),<br>27.575 (6)                                                                                                                      | 29.2994 (2),<br>7.4757 (5),<br>14.7336 (10)                                                                                                                    | 9.8176 (6),<br>7.4895 (4),<br>17.8098 (10)                                                                                                                                                                       |
| α, β, γ (°)                                                                             | 125.723 (4)                                                                                                                                   | 90.123 (4)                                                                                                                                   | 92.616 (5)                                                                                                                                                     | 100.749 (2)                                                                                                                                                    |                                                                                                                                                                | 94.444 (5),<br>93.278 (6),<br>94.635 (6)                                                                                                                       |                                                                                                                                                                | 94.428 (3)                                                                                                                                                                                                       |

|                                                                                             |                                                                                                                           |                          |                          |                          |                          |                            |                          |                       |
|---------------------------------------------------------------------------------------------|---------------------------------------------------------------------------------------------------------------------------|--------------------------|--------------------------|--------------------------|--------------------------|----------------------------|--------------------------|-----------------------|
| $V$ (Å <sup>3</sup> )                                                                       | 2377.0<br>(4)                                                                                                             | 2294.4<br>(3)            | 2525.4<br>(5)            | 751.35<br>(7)            | 3021.4<br>(5)            | 4355.3<br>(15)             | 3227.2<br>(3)            | 1305.63 (13)          |
| $Z$                                                                                         | 8                                                                                                                         | 8                        | 8                        | 2                        | 8                        | 12                         | 8                        | 2                     |
| Radiation type                                                                              | Mo $K\alpha$                                                                                                              | Mo $K\alpha$             | Mo $K\alpha$             | Mo $K\alpha$             | Mo $K\alpha$             | Mo $K\alpha$               | Mo $K\alpha$             | Mo $K\alpha$          |
| $\mu$ (mm <sup>-1</sup> )                                                                   | 0.33                                                                                                                      | 0.34                     | 0.32                     | 0.28                     | 0.28                     | 0.29                       | 0.26                     | 0.29                  |
| Crystal size<br>(mm)                                                                        | 0.31 ×<br>0.29 ×<br>0.21                                                                                                  | 0.31 ×<br>0.25 ×<br>0.20 | 0.31 ×<br>0.29 ×<br>0.21 | 0.31 ×<br>0.29 ×<br>0.26 | 0.25 ×<br>0.21 ×<br>0.19 | 0.30 ×<br>0.26 ×<br>0.23   | 0.31 ×<br>0.29 ×<br>0.27 | 0.31 × 0.25 ×<br>0.20 |
| Data collection                                                                             |                                                                                                                           |                          |                          |                          |                          |                            |                          |                       |
| Diffractometer                                                                              | Bruker D8 QUEST PHOTON-100                                                                                                |                          |                          |                          |                          |                            |                          |                       |
| Absorption<br>correction                                                                    | Multi-scan <i>SADABS</i> 2016/2: Krause, L., Herbst-Irmer, R., Sheldrick G.M. & Stalke D., J. Appl. Cryst. 48 (2015) 3-10 |                          |                          |                          |                          |                            |                          |                       |
| $T_{\min}, T_{\max}$                                                                        | 0.609,<br>0.745                                                                                                           | 0.689,<br>0.746          | 0.631,<br>0.746          | 0.664,<br>0.746          | 0.587,<br>0.746          | 0.679,<br>0.746            | 0.668,<br>0.746          | 0.513, 0.746          |
| No. of<br>measured,<br>independent and<br>observed [ $I >$<br>$2\sigma(I)$ ]<br>reflections | 10245,<br>2418,<br>1817                                                                                                   | 57350,<br>6971,<br>6919  | 37253,<br>6341,<br>3851  | 12793,<br>4509,<br>4347  | 44903,<br>7806,<br>6784  | 162486,<br>26455,<br>16622 | 27143,<br>8872,<br>7791  | 34218, 6462,<br>4546  |
| $R_{\text{int}}$                                                                            | 0.038                                                                                                                     | 0.040                    | 0.071                    | 0.026                    | 0.036                    | 0.069                      | 0.028                    | 0.108                 |
| $(\sin \theta/\lambda)_{\text{max}}$<br>(Å <sup>-1</sup> )                                  | 0.626                                                                                                                     | 0.717                    | 0.670                    | 0.716                    | 0.715                    | 0.716                      | 0.714                    | 0.668                 |
| <i>Refinement</i>                                                                           |                                                                                                                           |                          |                          |                          |                          |                            |                          |                       |
| $R[F^2 > 2\sigma(F^2)],$<br>$wR(F^2), S$                                                    | 0.036,<br>0.087, 1.03                                                                                                     | 0.031,<br>0.081,         | 0.044,<br>0.122,         | 0.028,<br>0.070,         | 0.036,<br>0.081,         | 0.044,<br>0.117,           | 0.033,<br>0.073,<br>1.02 | 0.056, 0.115,<br>1.01 |

|                                                               |                                                                        |                               |             |                                                                                                                             |                                                                                                                             |             |                                                                                                                             |                                                                                                                             |
|---------------------------------------------------------------|------------------------------------------------------------------------|-------------------------------|-------------|-----------------------------------------------------------------------------------------------------------------------------|-----------------------------------------------------------------------------------------------------------------------------|-------------|-----------------------------------------------------------------------------------------------------------------------------|-----------------------------------------------------------------------------------------------------------------------------|
|                                                               |                                                                        | 1.16                          | 1.01        | 1.06                                                                                                                        | 1.06                                                                                                                        | 1.02        |                                                                                                                             |                                                                                                                             |
| No. of reflections                                            | 2418                                                                   | 6971                          | 6341        | 4509                                                                                                                        | 7806                                                                                                                        | 26455       | 8872                                                                                                                        | 6462                                                                                                                        |
| No. of parameters                                             | 185                                                                    | 370                           | 387         | 229                                                                                                                         | 457                                                                                                                         | 1369        | 477                                                                                                                         | 387                                                                                                                         |
| No. of restraints                                             |                                                                        | 3                             |             | 1                                                                                                                           | 1                                                                                                                           |             | 1                                                                                                                           | 10                                                                                                                          |
| H-atom treatment                                              | H atoms treated by a mixture of independent and constrained refinement |                               |             |                                                                                                                             |                                                                                                                             |             |                                                                                                                             |                                                                                                                             |
| $\Delta\rho_{\max}, \Delta\rho_{\min}$ (e $\text{\AA}^{-3}$ ) | 0.28, -0.36                                                            | 0.44, -0.31                   | 0.52, -0.50 | 0.33, -0.24                                                                                                                 | 0.55, -0.36                                                                                                                 | 0.74, -0.55 | 0.27, -0.28                                                                                                                 | 0.61, -0.52                                                                                                                 |
| Absolute structure                                            |                                                                        | Refined as an inversion twin. |             | Flack x determined using 1933 quotients [(I+)-(I-)]/[(I+)+(I-)] (Parsons, Flack and Wagner, Acta Cryst. B69 (2013) 249-249- | Flack x determined using 2368 quotients [(I+)-(I-)]/[(I+)+(I-)] (Parsons, Flack and Wagner, Acta Cryst. B69 (2013) 249-249- |             | Flack x determined using 3166 quotients [(I+)-(I-)]/[(I+)+(I-)] (Parsons, Flack and Wagner, Acta Cryst. B69 (2013) 249-249- | Flack x determined using 1488 quotients [(I+)-(I-)]/[(I+)+(I-)] (Parsons, Flack and Wagner, Acta Cryst. B69 (2013) 249-249- |

|                              |  |          |  |            |            |  |          |          |
|------------------------------|--|----------|--|------------|------------|--|----------|----------|
|                              |  |          |  | 259).      |            |  |          |          |
| Absolute structure parameter |  | 0.07 (7) |  | 0.009 (19) | 0.007 (18) |  | 0.03 (2) | 0.06 (5) |

| <b>Table S2. Hydrogen bond geometries of Flu.D salts</b>           |           |                 |                 |                   |
|--------------------------------------------------------------------|-----------|-----------------|-----------------|-------------------|
| $D-H\cdots A$                                                      | $D-H$ (Å) | $H\cdots A$ (Å) | $D\cdots A$ (Å) | $D-H\cdots A$ (°) |
| <b>Flu.D-MSA (1:1)</b>                                             |           |                 |                 |                   |
| $N2-H2NB\cdots O5$                                                 | 0.89 (3)  | 1.91 (3)        | 2.739 (3)       | 154 (2)           |
| $N2-H2NC\cdots O3^i$                                               | 0.96 (3)  | 1.79 (3)        | 2.734 (2)       | 168 (2)           |
| $N2-H2NA\cdots O4^{ii}$                                            | 0.91 (3)  | 1.90 (3)        | 2.792 (3)       | 166 (2)           |
| Symmetry codes: (i) $-x+1/2, -y+3/2, -z+1$ ; (ii) $x, -y+1, z-1/2$ |           |                 |                 |                   |
| <b>Flu.D-MSA (2:2)</b>                                             |           |                 |                 |                   |
| $N2B-H2ND\cdots O3B$                                               | 0.90 (4)  | 1.88 (4)        | 2.777 (3)       | 175 (4)           |
| $N2A-H2NB\cdots O5A$                                               | 0.85 (4)  | 2.10 (4)        | 2.902 (3)       | 157 (4)           |
| $N2A-H2NC\cdots O5B$                                               | 0.90 (2)  | 1.89 (2)        | 2.770 (3)       | 169 (6)           |
| $N2A-H2NA\cdots O3A^i$                                             | 0.81 (5)  | 2.02 (5)        | 2.829 (3)       | 172 (5)           |
| $N2B-H2NF\cdots O5B^i$                                             | 0.82 (4)  | 2.14 (4)        | 2.911 (3)       | 158 (4)           |
| $N2B-H2NE\cdots O5A^{ii}$                                          | 0.90 (5)  | 1.89 (5)        | 2.775 (3)       | 167 (4)           |
| Symmetry codes: (i) $x-1/2, y-1/2, z$ ; (ii) $x, y-1, z$           |           |                 |                 |                   |
| <b>Flu.D-ESA (2:2)</b>                                             |           |                 |                 |                   |
| $N2A-H2NA\cdots O3B$                                               | 0.98 (3)  | 1.72 (3)        | 2.704 (3)       | 179 (3)           |
| $N2A-H2NB\cdots O5A$                                               | 0.93 (3)  | 1.85 (3)        | 2.714 (3)       | 153 (2)           |

|                                                                                      |          |          |           |            |
|--------------------------------------------------------------------------------------|----------|----------|-----------|------------|
| N2B—H2NE···O5B                                                                       | 0.86 (3) | 1.93 (3) | 2.741 (3) | 157 (2)    |
| N2B—H2ND···O4A                                                                       | 0.92 (3) | 1.78 (3) | 2.704 (3) | 175 (3)    |
| N2A—H2NC···O4B <sup>i</sup>                                                          | 0.91 (3) | 1.91 (3) | 2.790 (3) | 163 (2)    |
| N2B—H2NF···O3A <sup>ii</sup>                                                         | 0.89 (3) | 1.95 (3) | 2.816 (3) | 165 (3)    |
| Symmetry codes: (i) $-x, y+1/2, -z+3/2$ ; (ii) $-x+1, y-1/2, -z+3/2$ .               |          |          |           |            |
| <b>Flu.D-BSA (1:1)</b>                                                               |          |          |           |            |
| N2—H2NB···O5                                                                         | 1.00 (3) | 1.74 (3) | 2.738 (2) | 174 (3)    |
| N2—H2NA···O3 <sup>i</sup>                                                            | 0.90 (3) | 1.88 (3) | 2.778 (2) | 172 (3)    |
| N2—H2NC···O3 <sup>ii</sup>                                                           | 0.91 (3) | 2.16 (3) | 2.865 (2) | 134 (2)    |
| N2—H2NC···O4 <sup>iii</sup>                                                          | 0.91 (3) | 2.18 (3) | 2.870 (2) | 132 (2)    |
| Symmetry codes: (i) $-x+1, y-1/2, -z$ ; (ii) $x-1, y, z$ ; (iii) $-x+1, y+1/2, -z$ . |          |          |           |            |
| <b>Flu.D-BSA (2:2)</b>                                                               |          |          |           |            |
| N2A—H2NC···O3A                                                                       | 0.88 (4) | 2.30 (3) | 2.897 (3) | 124 (3)    |
| N2A—H2NA···O3B                                                                       | 0.89 (3) | 1.85 (3) | 2.734 (3) | 173 (3)    |
| N2B—H2NE···O5B                                                                       | 0.88 (4) | 1.88 (4) | 2.724 (3) | 161 (4)    |
| N2B—H2NF···O4A                                                                       | 0.96 (3) | 1.86 (3) | 2.799 (3) | 164 (3)    |
| N2A—H2NC···O5B <sup>i</sup>                                                          | 0.88 (4) | 2.07 (4) | 2.877 (3) | 150 (3)    |
| N2A—H2NB···O5A <sup>ii</sup>                                                         | 0.94 (4) | 1.84 (4) | 2.757 (3) | 166 (3)    |
| N2B—<br>H2ND···O5A <sup>iii</sup>                                                    | 0.90 (3) | 2.03 (3) | 2.863 (3) | 155 (3)    |
| Symmetry codes: (i) $x, y+1, z$ ; (ii) $-x+3/2, y, z+1/2$ ; (iii) $x, y-1, z$ .      |          |          |           |            |
| <b>Flu.D-BSA (6:6)</b>                                                               |          |          |           |            |
| N2A—H2NA···O4B                                                                       | 0.89 (2) | 1.88 (2) | 2.751 (2) | 168 (2)    |
| N2A—H2NB···O5A                                                                       | 0.92 (2) | 2.07 (2) | 2.895 (2) | 148.7 (19) |

|                                                                                                    |          |          |           |            |
|----------------------------------------------------------------------------------------------------|----------|----------|-----------|------------|
| N2B—H2NE···O3B                                                                                     | 0.90 (3) | 1.89 (3) | 2.778 (2) | 170 (2)    |
| N2C—H2NG···O3C                                                                                     | 0.93 (2) | 1.85 (2) | 2.770 (2) | 171.2 (19) |
| N2C—H2NH···O4A                                                                                     | 0.88 (2) | 1.99 (2) | 2.845 (2) | 164 (2)    |
| N2C—H2NI···O5D                                                                                     | 0.86 (2) | 2.30 (2) | 2.826 (2) | 120.0 (18) |
| N2D—H2NK···O4C                                                                                     | 0.93 (2) | 1.82 (2) | 2.746 (2) | 171.4 (19) |
| N2D—H2NL···O3D                                                                                     | 0.89 (3) | 1.96 (3) | 2.846 (2) | 171 (2)    |
| N2E—H2NM···O3F                                                                                     | 0.89 (3) | 1.89 (3) | 2.754 (2) | 163 (2)    |
| N2E—H2NO···O4E                                                                                     | 0.92 (2) | 2.58 (2) | 3.161 (2) | 122.1 (17) |
| N2E—H2NO···O5E                                                                                     | 0.92 (2) | 1.88 (2) | 2.745 (2) | 156.5 (19) |
| N2F—H2NP···O4E                                                                                     | 0.92 (2) | 1.85 (2) | 2.753 (2) | 169 (2)    |
| N2F—H2NQ···O5F                                                                                     | 0.90 (2) | 2.06 (2) | 2.874 (2) | 149.0 (19) |
| N2A—H2NC···O4A <sup>i</sup>                                                                        | 0.93 (2) | 1.93 (2) | 2.849 (2) | 167.6 (19) |
| N2B—H2ND···O3D <sup>i</sup>                                                                        | 0.91 (2) | 1.97 (3) | 2.839 (2) | 160 (2)    |
| N2B—H2NF···O3A <sup>i</sup>                                                                        | 0.87 (2) | 2.27 (2) | 2.815 (2) | 121.0 (19) |
| N2B—H2NF···O4B <sup>i</sup>                                                                        | 0.87 (2) | 2.31 (2) | 2.990 (2) | 135 (2)    |
| N2D—H2NJ···O4D <sup>i</sup>                                                                        | 0.86 (3) | 2.16 (3) | 2.937 (2) | 149 (2)    |
| N2C—H2NI···O4C <sup>ii</sup>                                                                       | 0.86 (2) | 2.34 (2) | 3.006 (2) | 135.1 (18) |
| N2E—<br>H2NN···O4F <sup>iii</sup>                                                                  | 0.88 (3) | 2.09 (2) | 2.858 (2) | 146 (2)    |
| Symmetry codes: (i) $x+1, y, z$ ; (ii) $x-1, y, z$ ; (iii) $-x+3, -y+3, -z+2$ ; (iv) $x+1, y+1, z$ |          |          |           |            |
| <b>Flu.D-PTSA (2:2)</b>                                                                            |          |          |           |            |
| N2A—H2NB···O5A                                                                                     | 0.88 (3) | 1.86 (3) | 2.736 (2) | 169 (3)    |
| N2B—H2ND···O4A                                                                                     | 1.00 (3) | 1.76 (3) | 2.740 (3) | 167 (3)    |



|                                                                                                           |          |          |           |         |
|-----------------------------------------------------------------------------------------------------------|----------|----------|-----------|---------|
| $N2B—H2NE\cdots O5B$                                                                                      | 0.88 (3) | 1.90 (3) | 2.765 (3) | 164 (3) |
| $N2A—H2NA\cdots O3B^i$                                                                                    | 0.94 (3) | 1.89 (3) | 2.803 (3) | 164 (2) |
| $N2B—H2NF\cdots O4B^i$                                                                                    | 0.88 (3) | 2.31 (3) | 2.940 (3) | 128 (2) |
| $N2A—H2NC\cdots O5B^{ii}$                                                                                 | 0.88 (3) | 2.05 (3) | 2.889 (3) | 161 (2) |
| $N2B—H2NF\cdots O5A^{iii}$                                                                                | 0.88 (3) | 2.11 (3) | 2.892 (3) | 148 (2) |
| Symmetry codes: $-x+3/2, y, z+1/2$ ; (ii) $-x+3/2, y-1, z+1/2$ ; (iii) $x, y+1, z$                        |          |          |           |         |
| <b>Flu.D-PTSA-H<sub>2</sub>O (1:2:3)</b>                                                                  |          |          |           |         |
| $N2—H2NA\cdots O5A^i$                                                                                     | 0.86 (6) | 2.10 (6) | 2.904 (6) | 155 (5) |
| $N2—H2NB\cdots O3B^i$                                                                                     | 0.97 (7) | 1.80 (7) | 2.745 (6) | 163 (6) |
| $N2—H2NC\cdots O3A$                                                                                       | 0.84 (7) | 2.07 (7) | 2.797 (6) | 145 (6) |
| $O1W—H1W\cdots O3A$                                                                                       | 0.89 (3) | 1.85 (3) | 2.740 (5) | 175 (6) |
| $O1W—H2W\cdots O3B$                                                                                       | 0.85 (3) | 1.97 (3) | 2.814 (5) | 171 (6) |
| $O2W—H3W\cdots O5B$                                                                                       | 0.90 (2) | 1.81 (3) | 2.700 (5) | 173 (4) |
| $O2W—H4W\cdots O1W^{iii}$                                                                                 | 0.88 (2) | 1.73 (3) | 2.602 (5) | 168 (5) |
| $O3W—H5W\cdots O4B^{iv}$                                                                                  | 0.93 (3) | 1.77 (3) | 2.689 (5) | 173 (5) |
| $O3W—H6W\cdots O4A^v$                                                                                     | 0.92 (3) | 1.74 (3) | 2.633 (5) | 165 (5) |
| $O3W—H7W\cdots O2W$                                                                                       | 0.89 (2) | 1.54 (2) | 2.431 (5) | 174 (5) |
| Symmetry codes: (i) $x, y+1, z$ , (ii) $x, y-1, z$ , (iii) $-x, y-1/2, -z+1$ , (iv) $-x+1, y-1/2, -z+1$ . |          |          |           |         |

**Table.S3 Details of experiments conducted for flutamide using various coformers.**

| API | Coformer | Experiment | Result |
|-----|----------|------------|--------|
|-----|----------|------------|--------|

|                  |                       |                  |                  |
|------------------|-----------------------|------------------|------------------|
| Flutamide (20mg) | Adenine               | Slow evaporation | Physical mixture |
|                  | Cytosine              | Slurry           |                  |
|                  | Thymine               |                  |                  |
|                  | Sorbic acid           |                  |                  |
|                  | Orotic acid           |                  |                  |
|                  | Uracil                |                  |                  |
|                  | 2-Bromo benzoic acid  |                  |                  |
|                  | 4-Chloro benzoic acid | Slow evaporation |                  |
|                  | Adipic acid           |                  |                  |
|                  | Ethenzamide           |                  |                  |
|                  | L-arginine            |                  |                  |
|                  | Pamoic acid           |                  |                  |
|                  | Theophylline          |                  |                  |
|                  | Saccharin             |                  |                  |
| Caffeine         |                       |                  |                  |
| Maleic acid      |                       |                  |                  |

|                      |                       |                  |                  |
|----------------------|-----------------------|------------------|------------------|
| Flutamide (20mg)     | DL tartaric acid      | Slurry           | Physical Mixture |
|                      | Nicotinic acid        |                  |                  |
|                      | Iso nicotinic acid    | Slow evaporation |                  |
|                      | Succinic acid         |                  |                  |
|                      | Benzoic acid          |                  |                  |
|                      | Oxalic acid           |                  |                  |
|                      | Paracetamol           |                  |                  |
|                      | Phenacitin            |                  |                  |
|                      | Imidazole             | Slurry           |                  |
|                      | Taurine               |                  |                  |
|                      | Camphor sulfonic acid |                  |                  |
|                      | L-proline             |                  |                  |
|                      | 2,2'-Bipyridine       |                  |                  |
| 4-Amino benzoic acid |                       |                  |                  |
| Imidazole            | Physical Mixture      |                  |                  |
| DL-tartaric acid     |                       |                  |                  |

| <b>Table S4. Degradation profile of flutamide. Rt indicates retention time</b> |               |                     |       |
|--------------------------------------------------------------------------------|---------------|---------------------|-------|
| Standard                                                                       | Rt Time (min) | Drug Percentage (%) |       |
|                                                                                |               | Flutamide           | Flu.D |
| Flutamide standard                                                             | 5.5           | 100                 | 0     |
| Acid                                                                           | 4.9           | 0                   | 10.05 |
| Base                                                                           | 4.9           | 0                   | 2.4   |
| Neutral                                                                        | 5.5           | 97.13               | 2.86  |
| 3% $H_2O_2$                                                                    | 5.5           | 100                 | 0     |
| Photolytic                                                                     | 5.5           | 100                 | 0     |
| Thermal                                                                        | 5.5           | 100                 | 0     |

| <b>Table S5. DSC observation of the Flu.D salts</b> |                         |                        |                         |                        |
|-----------------------------------------------------|-------------------------|------------------------|-------------------------|------------------------|
| Compound                                            | Initial endotherm       |                        | Final melting endotherm |                        |
|                                                     | T <sub>Onset</sub> (°C) | T <sub>Peak</sub> (°C) | T <sub>Onset</sub> (°C) | T <sub>Peak</sub> (°C) |
| Flutamide                                           | -                       | -                      | 111.29                  | 113.76                 |
| Flu.D                                               | -                       | -                      | 126.66                  | 128.63                 |
| Flu.D-MSA (1:1)                                     | 123                     | 126.21                 | 174.2                   | 175.63                 |
| Flu.D-BSA (2:2)                                     | 177.24                  | 183.65                 | 222.16                  | 223.43                 |
| Flu.D-PTSA (2:2)                                    | 174.8                   | 178.27                 | 215.19                  | 216.16                 |
| Flu.D-ESA (2:2)                                     | -                       | -                      | 142.66                  | 143.96                 |

| <b>Table S6. Cumulative drug release profiles at specified intervals of time in water media.</b> |                              |       |                 |                 |                 |                  |
|--------------------------------------------------------------------------------------------------|------------------------------|-------|-----------------|-----------------|-----------------|------------------|
| Time Interval (minutes)                                                                          | % Cumulative drug release of |       |                 |                 |                 |                  |
|                                                                                                  | Flutamide                    | Flu.D | Flu.D-MSA (1:1) | Flu.D-ESA (2:2) | Flu.D-BSA (2:2) | Flu.D-PTSA (2:2) |
| 0                                                                                                | 0                            | 0     | 0               | 0               | 0               | 0                |
| 1                                                                                                | 2                            | 0.31  | 3.7             | 2.3             | 7.5             | 11               |
| 5                                                                                                | 3.2                          | 3.1   | 18.8            | 10.8            | 22.5            | 32.3             |

|     |      |      |      |      |      |      |
|-----|------|------|------|------|------|------|
| 10  | 4.1  | 7.2  | 30.5 | 20.3 | 35.9 | 50.7 |
| 20  | 5.4  | 14   | 45.9 | 34.1 | 50.8 | 71.1 |
| 40  | 9.1  | 25.7 | 58.5 | 49.9 | 68.2 | 87.1 |
| 80  | 14.1 | 37.3 | 69.4 | 70.2 | 81.3 | 93.9 |
| 120 | 23.2 | 45.7 | 76.5 | 81.5 | 88.4 | 96.2 |

**Table S7. Cumulative drug release profiles at specified intervals of time in pH 1.2 media.**

| Time Interval<br>(minutes) | % Cumulative drug release of |       |                     |                    |                    |                      |
|----------------------------|------------------------------|-------|---------------------|--------------------|--------------------|----------------------|
|                            | Flutamide                    | Flu.D | Flu.D-<br>MSA (1:1) | Flu.D-ESA<br>(2:2) | Flu.D-BSA<br>(2:2) | Flu.D-<br>PTSA (2:2) |
| 0                          | 0                            | 0     | 0                   | 0                  | 0                  | 0                    |
| 1                          | 3.5                          | 0.43  | 6.3                 | 1.2                | 6.3                | 10.7                 |
| 5                          | 5.1                          | 0.49  | 30.5                | 16.3               | 25.9               | 29.5                 |
| 10                         | 5.8                          | 4.6   | 44.3                | 28.9               | 41.9               | 47.9                 |
| 20                         | 7.6                          | 11    | 56.9                | 46.4               | 60.1               | 67.8                 |
| 40                         | 10.4                         | 20.1  | 69.6                | 66.1               | 77.3               | 86                   |
| 80                         | 15.4                         | 30.9  | 75.5                | 81.8               | 87.2               | 95                   |
| 120                        | 25.6                         | 38.7  | 82.9                | 87.2               | 92.6               | 97.2                 |
